# Supplementary material for: Genome-wide identification and analysis of the CNGC gene family in maize
Source: PeerJ. 2018 Oct 17;6:e5816. doi: 10.7717/peerj.5816 (PMC6195792; doi:10.7717/peerj.5816)
Supplement: File S5 — Table S1. The GNGC information of 12 gramineae plants. Table S2. Numbers of known stress-related elements in the promoter regions of ZmCNGCs. Table S3. The protein–protein interaction information of maize CNGC protein with other maize proteins. Table S4. The FPKM data of ZmCNGC genes in different tissues. [file peerj-06-5816-s005.xlsx]

## Sheet: Table S1
Table S1 The GNGC information of 12 gramineae plants
Aegilops tauschii	Brachypodium distachyon	Hordeum vulgare	Leersia perrieri	Nicotiana attenuata str. UT	Setaria italica	Sorghum bicolor	Triticum aestivum	Triticum urartu
EMT07564	BRADI1G38680	HORVU6Hr1G083790	LPERR02G09240	OIT04668	Si016502	Sb04g009250	TRIAE_CS42_6DL_TGACv1_526370_AA1681070	TRIUR3_01913
EMT16564	BRADI3G09550	HORVU2Hr1G114940	LPERR04G22810	OIS96851	Si011861	Sb10g020550	TRIAE_CS42_6AL_TGACv1_472259_AA1520040	TRIUR3_12825
EMT29672	BRADI5G23700	HORVU6Hr1G044300	LPERR06G14000	OIS97291	Si008042	Sb01g013500	TRIAE_CS42_2DL_TGACv1_160734_AA0553580	TRIUR3_29345
EMT17021	BRADI1G13740	HORVU7Hr1G079400	LPERR06G05310	OIS96583	Si016638	Sb08g021830	TRIAE_CS42_2AL_TGACv1_097035_AA0322740	TRIUR3_29920
EMT29601	BRADI1G78010	HORVU5Hr1G092890	LPERR12G09580	OIT22988	Si034469	Sb06g030420	TRIAE_CS42_6AL_TGACv1_470872_AA1497360	TRIUR3_30887
EMT27184	BRADI3G47900	HORVU5Hr1G088830	LPERR12G03620	OIT05040	Si005993	Sb04g026580	TRIAE_CS42_2BL_TGACv1_130157_AA0405260	TRIUR3_11210
EMT21032	BRADI3G49290	HORVU5Hr1G065950	LPERR03G22790	OIT01534	Si016531	Sb02g032610	TRIAE_CS42_7BL_TGACv1_579414_AA1907130	TRIUR3_08948
EMT04124	BRADI1G46970	HORVU1Hr1G018730	LPERR09G15290	OIT22521	Si024468	Sb04g035530	TRIAE_CS42_4BS_TGACv1_329199_AA1098870	TRIUR3_28480
EMT04130	BRADI3G53747	HORVU5Hr1G096440	LPERR02G20260	OIS96184	Si020209	Sb10g005970	TRIAE_CS42_4DS_TGACv1_363028_AA1183080	TRIUR3_24328
EMT04122	BRADI4G37740	HORVU7Hr1G031330	LPERR03G29210	OIT04936	Si029078	Sb04g034650	TRIAE_CS42_4AL_TGACv1_290549_AA0986620	TRIUR3_31210
EMT05982	BRADI2G57697	HORVU3Hr1G076940	LPERR02G28160	OIT26635	Si028368	Sb01g007550	TRIAE_CS42_7AL_TGACv1_556032_AA1753160	TRIUR3_16181
EMT30277	BRADI1G46260	HORVU7Hr1G047340	LPERR01G28670	OIT01825	Si034425	Sb03g036490	TRIAE_CS42_6AL_TGACv1_472123_AA1518000	TRIUR3_34359
EMT24347	BRADI3G57510	HORVU1Hr1G066020	LPERR08G06990	OIS99066	Si000574	Sb09g024770	TRIAE_CS42_6DL_TGACv1_527827_AA1709040	TRIUR3_02202
EMT23907	BRADI1G08060	HORVU5Hr1G049240	LPERR05G17830	OIT04907	Si016450		TRIAE_CS42_6BL_TGACv1_499635_AA1588000	TRIUR3_02204
EMT08371	BRADI2G20660	HORVU7Hr1G079410	LPERR02G08790	OIT01012	Si024243		TRIAE_CS42_7DL_TGACv1_603075_AA1975340	TRIUR3_19641
EMT23215	BRADI2G51836	HORVU1Hr1G065250	LPERR05G13780	OIT07943	Si015276		TRIAE_CS42_6DL_TGACv1_529165_AA1717650	TRIUR3_02201
EMT23906		HORVU7Hr1G040990	LPERR06G08440	OIT08427	Si007973		TRIAE_CS42_5DL_TGACv1_433346_AA1410340	TRIUR3_32518
EMT06180		HORVU2Hr1G083820	LPERR07G04250	OIT23974	Si016455		TRIAE_CS42_5AL_TGACv1_376039_AA1231160	TRIUR3_31047
EMT29322		HORVU3Hr1G058300	LPERR04G10860	OIT03572	Si021198		TRIAE_CS42_6BL_TGACv1_499483_AA1583940	TRIUR3_26017
EMT07667		HORVU2Hr1G077680	LPERR01G24870	OIT01601	Si005846		TRIAE_CS42_6AL_TGACv1_474496_AA1535360	TRIUR3_06631
EMT02357			LPERR01G06690	OIT04724	Si000254		TRIAE_CS42_5DL_TGACv1_433121_AA1402750	TRIUR3_20343
EMT33150			LPERR01G26990		Si021360		TRIAE_CS42_5BL_TGACv1_406062_AA1340080
EMT20227			LPERR01G21050		Si004674		TRIAE_CS42_7DS_TGACv1_622441_AA2039690
EMT25885					Si003861		TRIAE_CS42_U_TGACv1_644844_AA2141950
					Si033392		TRIAE_CS42_7BS_TGACv1_591958_AA1926720
					Si012441		TRIAE_CS42_5BL_TGACv1_405743_AA1334310
					Si019482		TRIAE_CS42_5AL_TGACv1_375657_AA1225250
					Si000905		TRIAE_CS42_5BL_TGACv1_404998_AA1317500
							TRIAE_CS42_5AL_TGACv1_375151_AA1217010
							TRIAE_CS42_5DL_TGACv1_437676_AA1467100
							TRIAE_CS42_1BS_TGACv1_049361_AA0150610
							TRIAE_CS42_1AS_TGACv1_019890_AA0072520
							TRIAE_CS42_1DS_TGACv1_080801_AA0253910
							TRIAE_CS42_5AL_TGACv1_374430_AA1199970
							TRIAE_CS42_6AL_TGACv1_472493_AA1522760
							TRIAE_CS42_6BL_TGACv1_500056_AA1598040
							TRIAE_CS42_6AL_TGACv1_473518_AA1531510
							TRIAE_CS42_6DL_TGACv1_527683_AA1707370
							TRIAE_CS42_3DL_TGACv1_253514_AA0894810
							TRIAE_CS42_3B_TGACv1_221356_AA0738220
							TRIAE_CS42_1DL_TGACv1_061392_AA0193950
							TRIAE_CS42_1AL_TGACv1_001672_AA0033850
							TRIAE_CS42_1BL_TGACv1_033292_AA0138560
							TRIAE_CS42_6BL_TGACv1_500408_AA1604160
							TRIAE_CS42_7BS_TGACv1_592251_AA1934350
							TRIAE_CS42_U_TGACv1_675331_AA2156740
							TRIAE_CS42_7DS_TGACv1_621916_AA2029210
							TRIAE_CS42_6BS_TGACv1_514327_AA1658390
							TRIAE_CS42_6AS_TGACv1_485825_AA1552900
							TRIAE_CS42_1DL_TGACv1_063563_AA0228620
							TRIAE_CS42_1BL_TGACv1_030927_AA0103930
							TRIAE_CS42_1AL_TGACv1_001562_AA0032310
							TRIAE_CS42_7AS_TGACv1_569084_AA1806850
							TRIAE_CS42_7AS_TGACv1_569084_AA1806810
							TRIAE_CS42_7BS_TGACv1_594341_AA1957170
							TRIAE_CS42_7DS_TGACv1_622918_AA2047260
							TRIAE_CS42_7BS_TGACv1_592113_AA1930850
							TRIAE_CS42_6DS_TGACv1_542498_AA1722610
							TRIAE_CS42_2AL_TGACv1_094319_AA0295670
							TRIAE_CS42_7DS_TGACv1_622646_AA2043160
							TRIAE_CS42_2BL_TGACv1_130713_AA0416480
							TRIAE_CS42_7AS_TGACv1_569084_AA1806860
							TRIAE_CS42_7DS_TGACv1_622918_AA2047250
							TRIAE_CS42_7BS_TGACv1_592113_AA1930870
							TRIAE_CS42_2DL_TGACv1_160962_AA0555610
							TRIAE_CS42_3DS_TGACv1_271509_AA0900720
							TRIAE_CS42_3AS_TGACv1_213839_AA0708020
							TRIAE_CS42_3DL_TGACv1_252407_AA0889910
							TRIAE_CS42_3B_TGACv1_222560_AA0766830
							TRIAE_CS42_U_TGACv1_641804_AA2104620
							TRIAE_CS42_3B_TGACv1_223474_AA0782740
							TRIAE_CS42_2BL_TGACv1_133367_AA0442300
							TRIAE_CS42_6BS_TGACv1_514103_AA1655240
							TRIAE_CS42_3DL_TGACv1_249426_AA0848430
							TRIAE_CS42_2DL_TGACv1_158095_AA0508910
							TRIAE_CS42_3B_TGACv1_222641_AA0768370
							TRIAE_CS42_2AL_TGACv1_093114_AA0272300
							TRIAE_CS42_3DL_TGACv1_251198_AA0878660
							TRIAE_CS42_3AL_TGACv1_195297_AA0647510

## Sheet: Table S2
Table S2 Numbers of known stress-related elements in the promoter regions of ZmCNGCs
cis-element	ZmCNGC1	ZmCNGC2	ZmCNGC3	ZmCNGC4	ZmCNGC5	ZmCNGC6	ZmCNGC7	ZmCNGC8	ZmCNGC9	ZmCNGC10	ZmCNGC11	ZmCNGC12	total	PLACE_ID	motifSeq	mainAnnotation	mainArticleTitle
CACTFTPPCA1	25	29	26	12	19	10	26	6	20	17	18	11	219	S000449	YACT	Tetranucleotide (CACT) is a key component of Mem1 (mesophyll expression module 1) found in the cis-regulatory element in the distal region of the phosphoenolpyruvate carboxylase (ppcA1) of the C4 dicot F. trinervia; Y=T/C;	cis-Regulatory elements for mesophyll-specific gene expression in the C4 plant Flaveria trinervia, the promoter of the C4 phosphoenolpyruvate carboxylase gene.
EBOXBNNAPA	10	10	12	6	6	8	12	18	14	22	16	16	150	S000144	CANNTG	E-box of napA storage-protein gene of Brassica napus (B.n.); See S000042 (CACGTGMOTIF); see S000407 (Myc consensus: CANNTG); This sequence is also known as RRE (R response element)(Hartmann et al., 2005);	Disruption of an overlapping E-box/ABRE motif abolished high transcription of the napA storage-protein promoter in transgenic Brassica napus seeds.
DOFCOREZM	19	13	14	12	11	4	16	6	22	10	13	6	146	S000265	AAAG	Core site required for binding of Dof proteins in maize (Z.m.); Dof proteins are DNA binding proteins, with presumably only one zinc finger, and are unique to plants; Four cDNAs encoding Dof proteins, Dof1, Dof2, Dof3 and PBF, have been isolated from maize; PBF is an endosperm specific Dof protein that binds to prolamin box; Maize Dof1 enhances transcription from the promoters of both cytosolic o…	Diversity and similarity among recognition sequences of Dof transcription factors
MYCCONSENSUSAT	10	10	12	6	6	8	12	8	14	22	16	16	140	S000407	CANNTG	MYC recognition site found in the promoters of the dehydration-responsive gene rd22 and many other genes in Arabidopsis; Binding site of ATMYC2 (previously known as rd22BP1); see S000144 (E-box; CANNTG), S000174 (MYCATRD22); N=A/T/G/C; MYC recognition sequence in CBF3 promoter; Binding site of ICE1 (inducer of CBF expression 1) that regulates the transcription of CBF/DREB1 genes in the cold in Ar…	Arabidopsis AtMYC2 (bHLH) and AtMYB2 (MYB) function as transcriptional activators in abscisic acid signaling.
CAATBOX1	15	21	11	10	5	9	14	7	10	10	11	9	132	S000028	CAAT	"CAAT promoter consensus sequence" found in legA gene of pea;	Sequences responsible for the tissue specific promoter activity of a pea legumin gene in tobacco.
GTGANTG10	15	11	5	8	11	6	8	12	13	11	10	10	120	S000378	GTGA	"GTGA motif" found in the promoter of the tobacco (N.t.) late pollen gene g10 which shows homology to pectate lyase and is the putative homologue of the tomato gene lat56; Located between -96 and -93; See S000280;	Functional analysis of cis-regulatory elements within the promoter of the tobacco late pollen gene g10
CGCGBOXAT	0	3	0	15	14	16	3	5	2	9	12	35	114	S000501	VCGCGB	"CGCG box" recognized by AtSR1-6 (Arabidopsis thaliana signal-responsive genes); Multiple CGCG elements are found in promoters of many genes; Ca++/calmodulin binds to all AtSRs; V=A/C/G; B=G/T/C;	A calmodulin-binding/CGCG box DNA-binding protein family involved in multiple signaling pathways in plants.
ARR1AT	22	11	9	12	7	1	12	0	11	10	7	6	108	S000454	NGATT	"ARR1-binding element" found in Arabidopsis; ARR1 is a response regulator; N=G/A/C/T; AGATT is found in the promoter of rice non-symbiotic haemoglobin-2 (NSHB) gene (Ross et al., 2004);	Arabidopsis ARR1 and ARR2 response regulators operate as transcriptional activators.
WRKY71OS	7	8	6	12	8	4	6	12	16	6	13	9	107	S000447	TGAC	"A core of TGAC-containing W-box" of, e.g., Amy32b promoter; Binding site of rice WRKY71, a transcriptional repressor of the gibberellin signaling pathway; Parsley WRKY proteins bind specifically to TGAC-containing W box elements within the Pathogenesis-Related Class10 (PR-10) genes (Eulgem et al., 1999); See S000390 (TTGAC), S000442 (TGACT);	A rice WRKY gene encodes a transcriptional repressor of the gibberellin signaling pathway in aleurone cells.
GT1CONSENSUS	5	6	4	7	8	4	14	14	8	16	3	5	94	S000198	GRWAAW	Consensus GT-1 binding site in many light-regulated genes, e.g., RBCS from many species, PHYA from oat and rice, spinach RCA and PETA, and bean CHS15; R=A/G; W=A/T; For a compilation of related GT elements and factors, see Villain et al. (1996); GT-1 can stabilize the TFIIA-TBP-DNA (TATA box) complex; The activation mechanism of GT-1 may be achieved through direct interaction between TFIIA and GT…	Light-regulated transcription
GATABOX	8	7	15	2	10	6	10	0	10	5	9	3	85	S000039	GATA	"GATA box"; GATA motif in CaMV 35S promoter; Binding with ASF-2; Three GATA box repeats were found in the promoter of Petunia (P.h.) chlorophyll a/b binding protein, Cab22 gene; Required for high level, light regulated, and tissue specific expression; Conserved in the promoter of all LHCII type I Cab genes;	ASF-2: A factor that binds to the cauliflower mosaic virus 35S promoter and a conserved GATA motif in cab promoters.
CURECORECR	4	8	8	8	4	8	4	2	0	14	14	10	84	S000493	GTAC	GTAC is the core of a CuRE (copper-response element) found in Cyc6 and Cpx1 genes in Chlamydomonas; Also involved in oxygen-response of these genes; For CuRE, see Quin and Merchant, 1995;	Coordinate copper- and oxygen-responsive Cyc6 and Cpx1 expression in Chlamydomonas is mediated by the same element.
ACGTATERD1	0	8	6	6	10	12	4	1	4	10	12	8	81	S000415	ACGT	ACGT sequence (from -155 to -152) required for etiolation-induced expression of erd1 (early responsive to dehydration) in Arabidopsis;	Two different novel cis-acting elements of erd1, a clpA homologous Arabidopsis gene function in induction by dehydration stress and dark-induced senescence.
ROOTMOTIFTAPOX1	5	8	3	2	6	5	9	1	10	7	4	1	61	S000098	ATATT	Motif found both in promoters of rolD;	Evaluation in tobacco of the organ specificity and strength of the rol D promoter, domain A of the 35S promoter and the 35S^2 promoter
POLLEN1LELAT52	6	6	1	5	4	3	7	3	9	2	4	1	51	S000245	AGAAA	One of two co-dependent regulatory elements responsible for pollen specific activation of tomato (L.e.) lat52 gene; Found at -72 to -68 region; See S000246 (POLLEN2LELAT52); AGAAA and TCCACCATA (S000246) are required for pollen specific expression; Also found in the promoter of tomato endo-beta-mannanase gene (LeMAN5) gene (Filichkin et al. 2004);	Functional architecture of a late pollen promoter: pollen-specific transcription is developmentally regulated by multiple stage-specific and co-dependent activator elements
RAV1AAT	10	6	6	1	1	1	4	0	8	4	5	2	48	S000314	CAACA	Binding consensus sequence of Arabidopsis (A.t.) transcription factor, RAV1; RAV1 specifically binds to DNA with bipartite sequence motifs of RAV1-A (CAACA) and RAV1-B (CACCTG); RAV1 protein contain AP2-like and B3-like domains; The AP2-like and B3-like domains recognize the CAACA and CACCTG motifs, respectively; The expression level of RAV1 were relatively high in rosette leaves and roots; See S…	RAV1, a novel DNA-binding protein, binds to bipartite recognition sequence through two distinct DNA-binding domains uniquely found in higher plants
CGACGOSAMY3	0	5	1	4	7	8	1	6	3	1	2	7	45	S000205	CGACG	"CGACG element" found in the GC-rich regions of the rice (O.s.) Amy3D and Amy3E amylase genes, but not in Amy3E gene; May function as a coupling element for the G box element;	Three cis-elements required for rice alpha-amylase Amy3D expression during sugar starvation
WBOXNTERF3	5	3	0	5	5	1	2	0	8	2	8	5	44	S000457	TGACY	"W box" found in the promoter region of a transcriptional repressor ERF3 gene in tobacco; May be involved in activation of ERF3 gene by wounding;(Nishiuchi et al., 2004) Y=C/T; See S000142, S000390, S000442, S000447;	Rapid and transient activation of transcription of the ERF3 gene by wounding in tobacco leaves: Possible involvement of NtWRKYs and autorepression.
MYBCORE	5	5	5	6	1	2	6	4	2	1	2	4	43	S000176	CNGTTR	Binding site for all animal MYB and at least two plant MYB proteins ATMYB1 and ATMYB2, both isolated from Arabidopsis; ATMYB2 is involved in regulation of genes that are responsive to water stress in Arabidopsis; A petunia MYB protein (MYB.Ph3) is involved in regulation of flavonoid biosynthesis (Solano et al. EMBO J 14:1773 (1995)); See S000355;	New light on Myc and Myb. Part II. Myb.
SURECOREATSULTR11	1	0	4	1	3	1	1	19	4	2	2	3	41	S000499	GAGAC	Core of sulfur-responsive element (SURE) found in the promoter of SULTR1;1 high-affinity sulfate transporter gene in Arabidopsis; SURE contains auxin response factor (ARF) binding sequence (GAGACA)(see S000270 ARF:TGTCTC; its complementary seq is GAGACA), and this core sequence is a part of it; this core seq is involved in -S response; Beware of other SURE (sucrose responsive element) !!;	Identification of a novel cis-acting element conferring sulfur deficiency response in Arabidopsis roots.
SORLIP2AT	1	3	3	6	2	4	0	1	2	7	5	5	39	S000483	GGGCC	one of "Sequences Over-Represented in Light-Induced Promoters (SORLIPs) in Arabidopsis; Computationally identified phyA-induced motifs; See also S000482, S000484, S000485, S000486 (all SORLIPs), and also S000487, S000488, S000489, S000490 (all SORLREPs);	Identification of promoter motifs involved in the network of phytochrome A-regulated gene expression by combined analysis of genomic sequence and microarray data.
OSE2ROOTNODULE	3	2	3	5	5	1	2	3	2	3	3	3	35	S000468	CTCTT	One of the consensus sequence motifs of organ-specific elements (OSE) characteristic of the promoters activated in infected cells of root nodules; See also S000467;	The promoter of the Vicia faba L. leghemoglobin gene VfLb29 is specifically activated in the infected cells of root nodules and in the arbuscule-containing cells of mycorrhizal roots from different legume and nonlegume plants.
SORLIP1AT	0	4	2	2	6	3	2	0	1	4	2	8	34	S000482	GCCAC	one of "Sequences Over-Represented in Light-Induced Promoters (SORLIPs) in Arabidopsis; Computationally identified phyA-induced motifs; SORLIP 1 is most over-represented, and most statistically singnificant; See also S000483, S000484, S000485, S000486 (all SORLIPs), and also S000487, S000488, S000489, S000490 (all SORLREPs); Over-represented in light-induced cotyledon and root common genes and ro…	Identification of promoter motifs involved in the network of phytochrome A-regulated gene expression by combined analysis of genomic sequence and microarray data.
LTRECOREATCOR15	0	4	0	5	5	13	0	2	0	1	0	4	34	S000153	CCGAC	Core of low temperature responsive element (LTRE) of cor15a gene in Arabidopsis (A.t.); A portion of repeat-C (C-repeat), TGGCCGAC, which is repeated twice in cor15a promoter (Baker et al., 1994); ABA responsiveness; Involved in cold induction of BN115 gene from winter Brassica napus; LTRE; See S000157, S000152; Light signaling mediated by phytochrome is necessary for cold- or drought- induced ge…	The 5'-region of Arabidopsis thaliana cor15a has cis-acting elements that confer cold-, drought- and ABA-regulated gene expression.
CCAATBOX1	3	5	1	3	3	2	4	0	2	3	6	1	33	S000030	CCAAT	Common sequence found in the 5'-non-coding regions of eukaryotic genes; "CCAAT box" found in the promoter of heat shock protein genes; Located immediately upstream from the most distal HSE of the promoter; "CCAAT box" act cooperatively with HSEs to increase the hs promoter activity;	Synergistic effect of upstream sequences, CCAAT box elements, and HSE sequences for enhanced expression of chimaeric heat shock genes in transgenic tobacco
SEF4MOTIFGM7S	1	4	4	0	1	1	8	8	1	1	2	2	33	S000103	RTTTTTR	"SEF4 binding site"; Soybean (G.m.) consensus sequence found in 5'upstream region (-199) of beta-conglycinin (7S globulin) gene (Gmg17.1); "Binding with SEF4 (soybean embryo factor 4)"; R=A/G;	Nuclear factors interact with a soybean beta-conglycinin enhancer.
ABRELATERD1	0	3	4	3	4	4	2	1	1	3	3	4	32	S000414	ACGTG	ABRE-like sequence (from -199 to -195) required for etiolation-induced expression of erd1 (early responsive to dehydration) in Arabidopsis;	Two different novel cis-acting elements of erd1, a clpA homologous Arabidopsis gene function in induction by dehydration stress and dark-induced senescence.
NODCON2GM	3	2	3	5	5	1	2	0	2	3	3	3	32	S000462	CTCTT	One of two putative nodulin consensus sequences; See also S000461 (NODCON1GM);	A small family of nodule specific genes from soybean.
SITEIIATCYTC	2	3	4	3	0	2	0	1	1	7	4	3	30	S000474	TGGGCY	"Site II element" found in the promoter regions of cytochrome genes (Cytc-1, Cytc-2) in Arabidopsis; Located between -147 and -156 from the translational starts sites (Welchen et al., 2005); Y=C/T; See also S000308; Overrepresented in the promoters of nuclear genes encoding components of the oxidative phosphorylation (OxPhos) machinery from both Arabidopsis and rice (Welchen and Gonzalez, 2006);)	Differential expression of the Arabidopsis cytochrome c genes Cytc-1 and Cytc-2. Evidence for the involvement of TCP-domain protein-binding elements in anther- and meristem-specific expression of the Cytc-1 gene.
RHERPATEXPA7	1	3	1	4	4	3	0	1	1	3	3	5	29	S000512	KCACGW	"Right part of RHEs (Root Hair-specific cis-Elements)" conserved among the Arabidopsis thaliana A7 (AtEXPA7) orthologous (and paralogous) genes from diverse angiosperm species with different hair distribution patterns; K=G/T; W=T/A;	Functional Conservation of a Root Hair Cell-Specific cis-Element in Angiosperms with Different Root Hair Distribution Patterns.
CBFHV	1	2	2	3	5	9	1	0	0	0	1	3	27	S000497	RYCGAC	Binding site of barley (H.v.) CBF1, and also of barley CBF2; CBF = C-repeat (CRT) binding factors; CBFs are also known as dehydration-responsive element (DRE) binding proteins (DREBs); See also S000411 (SQ=GTCGAC); R=A/G; Y=C/T;	Characterisation of the DNA-binding profile of barley HvCBF1 using an enzymatic method for rapid, quantitative and high-throughput analysis of the DNA-binding activity.
BIHD1OS	0	3	3	1	2	0	4	0	5	3	3	2	26	S000498	TGTCA	Binding site of OsBIHD1, a rice BELL homeodomain transcription factor;	Up-regulation of OsBIHD1, a rice gene encoding BELL homeodomain transcriptional factor, in disease resistance responses.
ASF1MOTIFCAMV	2	2	3	6	1	3	0	1	3	1	2	2	26	S000024	TGACG	"ASF-1 binding site" in CaMV 35S promoter; ASF-1 binds to two TGACG motifs; See S000023 (AS1); Found in HBP-1 binding site of wheat histone H3 gene; TGACG motifs are found in many promoters and are involved in transcriptional activation of several genes by auxin and/or salicylic acid; May be relevant to light regulation; Binding site of tobacco TGA1a; TGA1a and b show homology to CREB; TGA6 is a …	The Arabidopsis NPR1 disease resistance protein is a novel cofactor that confers redox regulation of DNA binding activity to the basic domain/leucine zipper transcription factor TGA1.
TATABOX5	2	1	2	0	1	2	6	1	5	0	4	1	25	S000203	TTATTT	"TATA box"; TATA box found in the 5'upstream region of pea (Pisum sativum) glutamine synthetase gene; a functional TATA element by in vivo analysis;	cis elements and trans-acting factors affecting regulation of a nonphotosynthetic light-regulated gene for chloroplast glutamine synthetase
IBOXCORE	2	2	3	0	5	0	5	0	2	2	3	1	25	S000199	GATAA	"I box"; "I-box"; Conserved sequence upstream of light-regulated genes; Conserved sequence upstream of light-regulated genes of both monocots and dicots; See IBOX (S000124);	Light-regulated transcription
GCCCORE	0	5	0	5	6	1	0	1	0	2	1	4	25	S000430	GCCGCC	Core of GCC-box found in many pathogen-responsive genes such as PDF1.2, Thi2.1, and PR4; Has been shown to function as ethylene-responsive element; See S000036, S000232, S000332; Appears to play important roles in regulating jasmonate-responsive gene expression; Tomato Pti4 (ERF) regulates defence-related gene expression via GCC box and non-GCC box cis elements (Myb1 (GTTAGTT) and G-box(CACGTG));	A role for the GCC-box in jasmonate-mediated activation of the PDF1.2 gene of Arabidopsis.
RYREPEATLEGUMINBOX	0	0	0	1	0	0	2	13	0	2	1	5	24	S000100	CATGCAY	"RY repeat (CATGCAY)" or legumin box found in seed-storage protein genes in legume such as soybean (G.m.);	Tissue-specific and temporal regulation of a beta-conglycinin gene: roles of the RY repeat and other cis-acting elements.
MYB2CONSENSUSAT	3	3	4	1	1	1	5	0	1	1	1	3	24	S000409	YAACKG	MYB recognition site found in the promoters of the dehydration-responsive gene rd22 and many other genes in Arabidopsis; Y=C/T; K=G/T; See S000177 (MYB2), S000175 (MYBATRD22);	Arabidopsis AtMYC2 (bHLH) and AtMYB2 (MYB) function as transcriptional activators in abscisic acid signaling.
TAAAGSTKST1	4	4	1	2	1	0	4	0	5	0	3	0	24	S000387	TAAAG	TAAAG motif found in promoter of Solanum tuberosum (S.t.) KST1 gene; Target site for trans-acting StDof1 protein controlling guard cell-specific gene expression; KST1 gene encodes a K+ influx channel of guard cells; See S000265;	Involvement of TAAAG elements suggests a role for Dof transcription factors in guard cell-specific gene expression
MYB1AT	3	3	4	0	0	0	3	0	4	0	6	0	23	S000408	WAACCA	MYB recognition site found in the promoters of the dehydration-responsive gene rd22 and many other genes in Arabidopsis; W=A/T;	Arabidopsis AtMYC2 (bHLH) and AtMYB2 (MYB) function as transcriptional activators in abscisic acid signaling.
DPBFCOREDCDC3	3	3	5	2	2	1	0	1	1	2	2	0	22	S000292	ACACNNG	A novel class of bZIP transcription factors, DPBF-1 and 2 (Dc3 promoter-binding factor-1 and 2) binding core sequence; Found in the carrot (D.c.) Dc3 gene promoter; Dc3 expression is normally embryo-specific, and also can be induced by ABA; The Arabidopsis abscisic acid response gene ABI5 encodes a bZIP transcription factor; abi5 mutant have a pleiotropic defects in ABA response; ABI5 regulates a…	Isolation of a novel class of bZIP transcription factors that interact with ABA-responsive and embryo-specification elements in the Dc3 promoter using a modified yeast one-hybrid system
GT1GMSCAM4	1	2	0	3	1	1	3	0	2	7	0	1	21	S000453	GAAAAA	"GT-1 motif" found in the promoter of soybean (Glycine max) CaM isoform, SCaM-4; Plays a role in pathogen- and salt-induced SCaM-4 gene expression; See also S000198 (GT-1 consensus);	Pathogen- and NaCl-induced expression of the SCaM-4 promoter is mediated in part by a GT-1 box that interacts with a GT-1-like transcription factor.
DRECRTCOREAT	0	2	0	3	4	5	0	4	0	0	0	3	21	S000418	RCCGAC	Core motif of DRE/CRT (dehydration-responsive element/C-repeat) cis-acting element found in many genes in Arabidopsis and in rice; R=G/A; Os DREB1A bound to GCCGAC more preferentially than to ACCGAC whereas At DREB1A bound to both GCCGAC and ACCGAC efficiently; See S000402 (ACCGAC); Maize ZmDREB1A bound to DRE (Qin et al. 2004); HaDREB2 in Helianthus annuus (sunflower)(Diaz-Martin et al. 2005);	OsDREB genes in rice, Oryza sativa L., encode transcription activators that function in drought-, high-salt- and cold-responsive gene expression.
RYREPEATBNNAPA	0	0	3	1	0	0	3	2	1	3	2	5	20	S000264	CATGCA	"RY repeat" found in RY/G box (the complex containing the two RY repeats and the G-box) of napA gene in Brassica napus (B.n.); Found between -78 and -50; Required for seed specific expression; See S000262, S000263; dist B ABRE mediated transactivation by ABI3 adn ABI3-dependent response to ABA; a tetramer of the composite RY/G complex mediated only ABA-independent transactivation by ABI3; B2 doma…	Interaction between composite elements in the napA promoter: both the B-box ABA-responsive complex and the RY/G complex are necessary for seed-specific expression
MYBPZM	0	1	2	0	1	3	0	2	2	2	3	4	20	S000179	CCWACC	Core of consensus maize P (myb homolog) binding site; W=A/T; 6 bp core; Maize P gene specifies red pigmentation of kernel pericarp, cob, and other floral organs; P binds to A1 gene, but not Bz1 gene; Maize C1 (myb homolog) activates both A1 and Bz1 genes (Grotewold et al. 1994); W=A/T;	The myb-homologous P gene controls phlobaphene pigmentation in maize floral organs by directly activating a flavonoid biosynthetic gene subset
EECCRCAH1	1	2	4	0	2	0	2	0	2	1	2	4	20	S000494	GANTTNC	"EEC"; Consensus motif of the two enhancer elements, EE-1 and EE-2, both found in the promoter region of the Chlamydomonas Cah1 (encoding a periplasmic carbonic anhydrase); Binding site of Myb transcription factor LCR1 (see Yoshioka et al, 2004); N=A/G/C/T;	Cis-acting elements and DNA-binding proteins involved in CO2-responsive transcriptional activation of Cah1 encoding a periplasmic carbonic anhydrase in Chlamydomonas reinhardtii.
PRECONSCRHSP70A	0	2	1	1	3	5	0	1	0	3	3	1	20	S000506	SCGAYNRNNNNNNNNNNNNNNNHD	Consensus sequence of PRE (plastid response element) in the promoters of HSP70A in Chlamydomonas; Involved in induction of HSP70A gene by both MgProto and light; S=G/C; Y=C/T; R=A/G; H=T/C/A; D=A/T/G;	Identification of a plastid response element that acts as an enhancer within the Chlamydomonas HSP70A promoter.
WBOXHVISO1	1	1	0	0	4	1	0	0	5	1	6	0	19	S000442	TGACT	SUSIBA2 bind to W-box element in barley iso1 (encoding isoamylase1) promoter;	A novel WRKY transcription factor, SUSIBA2, participates in sugar signaling in barley by binding to the sugar-responsive elements of the iso1 promoter.
WBOXATNPR1	0	2	0	4	1	1	0	0	5	4	2	0	19	S000390	TTGAC	"W-box" found in promoter of Arabidopsis thaliana (A.t.) NPR1 gene; Located between +70 and +79 in tandem; They were recognized specifically by salicylic acid (SA)-induced WRKY DNA binding proteins; See S000142 (SQ=TTGACC); See S000310 (SQ=TTTGACY); A cluster of WRKY binding sites act as negative regulatory elements for the inducible expression of AtWRKY18 (Chena and Chen, 2002);	Evidence for an important role of WRKY DNA binding proteins in the regulation of NPR1 gene expression
REALPHALGLHCB21	4	2	3	0	0	0	0	0	3	0	7	0	19	S000362	AACCAA	"REalpha" found in Lemna gibba Lhcb21 gene promoter; Located at -134 to -129; Binding site of proteins of whole-cell extracts; The DNA binding activity is high in etiolated plants but much lower in green plants; Required for phytochrome regulation; See S000363;	A DNA binding activity for one of two closely defined phytochrome regulatory elements in an Lhcb promoter is more abundant in etiolated than in green plants
MYBST1	1	5	5	0	1	1	1	0	2	2	1	0	19	S000180	GGATA	Core motif of MybSt1 (a potato MYB homolog) binding site; MybSt1 cDNA clone was isolated by using CaMV 35S promoter domain A as a probe (Baranowskij et al. 1994); The Myb motif of the MybSt1 protein is distinct from the plant Myb DNA binding domain described so far;	A novel DNA binding protein with homology to Myb oncoproteins containing only one repeat can function as a transcriptional activator
PALBOXAPC	0	7	0	4	2	2	0	0	0	1	1	2	19	S000137	CCGTCC	Box A; Consensus; One of three putative cis-acting elements (boxes P, A, and L) of phenylalanine ammonia-lyase (PAL; EC 4.3.1.5) genes in parsley (P.c.); "None of these elements (boxes P, A, and L) alone, or the promoter region containing all of them together, conferred elicitor or light responsiveness. These elements appear to be necessary but not sufficient for elicitor- or light-mediated PAL g…	Modes of expression and common structural features of the complete phenylalanine ammonia-lyase gene family in parsley.
ABRERATCAL	0	1	2	5	2	2	1	0	0	0	3	2	18	S000507	MACGYGB	"ABRE-related sequence" or "Repeated sequence motifs" identified in the upstream regions of 162 Ca(2+)-responsive upregulated genes; see also ABRE; M=C/A; Y=T/C; B=T/C/G;	Rapid Transcriptome Changes Induced by Cytosolic Ca2+ Transients Reveal ABRE-Related Sequences as Ca2+-Responsive cis Elements in Arabidopsis.
INRNTPSADB	1	1	2	1	4	1	0	0	3	4	0	0	17	S000395	YTCANTYY	"Inr (initiator)" elements found in the tobacco psaDb gene promoter without TATA boxes; Light-responsive transcription of psaDb depends on Inr, but not TATA box;	Photosynthesis nuclear genes generally lack TATA-boxes: a tobacco photosystem I gene responds to light through an initiater
OSE1ROOTNODULE	2	3	1	3	1	0	1	2	0	1	2	1	17	S000467	AAAGAT	One of the consensus sequence motifs of organ-specific elements (OSE) characteristic of the promoters activated in infected cells of root nodules; See also S000468;	The promoter of the Vicia faba L. leghemoglobin gene VfLb29 is specifically activated in the infected cells of root nodules and in the arbuscule-containing cells of mycorrhizal roots from different legume and nonlegume plants.
POLASIG1	1	1	2	0	0	0	6	0	2	0	3	1	16	S000080	AATAAA	"PolyA signal"; poly A signal found in legA gene of pea, rice alpha-amylase; -10 to -30 in the case of animal genes. Near upstream elements (NUE) in Arabidopsis (Loke et al. 2005);	Structural analysis of plant genes.
MYBCOREATCYCB1	1	1	2	1	3	1	2	0	1	1	1	2	16	S000502	AACGG	"Myb core" in the 18 bp sequence which is able to activate reporter gene without leading to M-phase-specific expression, found in the promoter of Arabidopsis thaliana cyclin B1:1 gene; the 18 bp sequence share homology with a sequence found in the N. sylvestris cyclin B1 promoter (Trehin et al., 1999; see S000283):	Characterization of cis-acting element involved in cell cycle phase-independent activation of Arath;CycB1;1 transcription and identification of putative regulatory proteins.
CRTDREHVCBF2	0	0	0	0	0	4	0	11	0	0	0	0	15	S000411	GTCGAC	Preferred sequence for AP2 transcriptional activator HvCBF2 of barley; "Core CRT/DRE motif"; HvCBF2 bound to a (G/a)(T/c)CGAC core motif (Xue, 2003); DNA binding is regulated by temperature; This motif was erroneously ID-labeled in PLACEdb as CDTDREHVCBF2, and was corrected on 22 June, 2006;	The DNA-binding activity of an AP2 transcriptional activator HvCBF2 involved in regulation of low-temperature responsive genes in barley is modulated by temperature.
NODCON1GM	2	3	1	3	1	0	1	0	0	1	2	1	15	S000461	AAAGAT	One of two putative nodulin consensus sequences; See also S000462 (NODCON2GM);	A small family of nodule specific genes from soybean.
HEXAMERATH4	0	2	1	1	1	4	0	0	1	1	0	4	15	S000146	CCGTCG	hexamer motif of Arabidopsis thaliana (A.t.) histone H4 promoter;	Identification of cis-elements regulating the expression of an Arabidopsis histone H4 gene.
E2FCONSENSUS	0	0	0	3	1	0	4	0	1	3	0	2	14	S000476	WTTSSCSS	"E2F consensus sequence" of all different E2F-DP-binding motifs that were experimentally verified in plants (Vandepoele et al., 2005); See also S000417, S000397, S000396, S000367, S000366; W=A/T; S=C/G;	Genome-wide identification of potential plant E2F target genes.
WBOXNTCHN48	1	1	0	2	3	1	0	1	0	0	4	1	14	S000508	CTGACY	"W box" identified in the region between -125 and -69 of a tobacco class I basic chitinase gene CHN48; NtWRKY1, NtWRKY2 and NtWRKY4 bound to W box; NtWRKYs possibly involved in elicitor-respsonsive transcription of defense genes in tobacco; Y=C/T; see also S000442 (TGACT) and S000447 (TGAC);	Elicitor-induced activation of transcription via W box-related cis-acting elements from a basic chitinase gene by WRKY transcription factors in tobacco.
POLASIG3	1	2	1	0	0	3	1	1	1	2	2	0	14	S000088	AATAAT	"Plant polyA signal"; Consensus sequence for plant polyadenylation signal;	Structural analysis of plant genes.
CANBNNAPA	1	0	1	0	0	2	0	2	2	1	3	1	13	S000148	CNAACAC	Core of "(CA)n element" in storage protein genes in Brasica napus (B.n.); embryo- and endosperm-specific transcription of napin (storage protein) gene, napA; seed specificity; activator and repressor;	Functional dissection of a napin gene promoter: identification of promoter elements required for embryo and endosperm-specific transcription.
-300ELEMENT	4	1	1	0	0	0	4	0	1	2	0	0	13	S000122	TGHAAARK	Present upstream of the promoter from the B-hordein gene of barley and the alpha-gliadin, gamma-gliadin, and low molecular weight glutenin genes of wheat; See S000001 -300CORE; See S000002 -300MOTIF;	Differential gene expression in the developing barley endosperm.
MYCATRD22	0	1	0	0	0	0	1	1	1	3	3	3	13	S000174	CACATG	Binding site for MYC (rd22BP1) in Arabidopsis (A.t.) dehydration-resposive gene, rd22; MYC binding site in rd22 gene of Arabidopsis thaliana; ABA-induction; Located at ca. -200 of rd22 gene; Also MYB at ca. -141 of rd22 gene; See also S000175 (MYBATRD22);	Role of Arabidopsis MYC and MYB homologs in drought- and abscisic acid-regulated gene expression.
-10PEHVPSBD	3	3	2	1	0	1	2	0	0	0	1	0	13	S000392	TATTCT	"-10 promoter element" found in the barley (H.v.) chloroplast psbD gene promoter; Involved in the expression of the plastid gene psbD which encodes a photosystem II reaction center chlorophyll-binding protein that is activated by blue, white or UV-A light;	Analysis of barley chloroplast psbD light-responsive promoter elements in transplastomic tobacco
CATATGGMSAUR	2	0	2	0	2	0	2	2	2	0	0	0	12	S000370	CATATG	Sequence found in NDE element in soybean (G.m.) SAUR (Small Auxin-Up RNA) 15A gene promoter; Involved in auxin responsiveness; See S000359, S000360;	Multiple auxin response modules in the soybean SAUR 15A promoter
ACGTABREMOTIFA2OSEM	0	0	0	1	1	1	0	6	0	1	2	0	12	S000394	ACGTGKC	Experimentally determined sequence requirement of ACGT-core of motif A in ABRE of the rice gene, OSEM; See S000281; DRE and ABRE are interdependent in the ABA-responsive expression of the rd29A in Arabidopsis; K=G/T;	Experimentally Determined Sequence Requirement of ACGT-Containing Abscisic Acid Response Element
MYCATERD1	0	1	0	0	0	0	1	0	1	3	3	3	12	S000413	CATGTG	MYC recognition sequence (from -466 to -461) necessary for expression of erd1 (early responsive to dehydration) in dehydrated Arabidopsis; NAC protein bound specifically to the CATGTG motif (Tran et al., 2004)); NAC protein bound specifically to the CATGTG motif (Tran et al., 2004);	Two different novel cis-acting elements of erd1, a clpA homologous Arabidopsis gene function in induction by dehydration stress and dark-induced senescence.
ANAERO2CONSENSUS	0	0	0	0	2	1	1	1	1	1	1	3	11	S000478	AGCAGC	One of 16 motifs found in silico in promoters of 13 anaerobic genes involved in the fermentative pathway (anaerobic set 1)(Mohanty et al., 2005); Arbitrary named ANAERO2CONSENSUS by the PLACEdb curator; See also S000477, S000479, S000480, S000481;	Detection and preliminary analysis of motifs in promoters of anaerobically induced genes of different plant species.
CARGCW8GAT	0	0	0	0	4	2	2	1	0	0	2	0	11	S000431	CWWWWWWWWG	A variant of CArG motif (see S000404), with a longer A/T-rich core; Binding site for AGL15 (AGAMOUS-like 15); W=A/T;	Binding site selection for the plant MADS domain protein AGL15: an in vitro and in vivo study.
PREATPRODH	3	0	1	1	1	0	1	2	0	0	1	0	10	S000450	ACTCAT	"PRE (Pro- or hypoosmolarity-responsive element) found in the promoter region of proline dehydrogenase (ProDH) gene in Arabidopsis; Core of 9-bp sequence ACTCATCCT which is necessary for the efficient expression of ProDH in response to L-Pro and hypoosmolarity (Satoh et al., 2002); ATB2-binding site; Similar to GCN4 motif (ATGA(C/G)TCAT); ATB2 subgroup of bZIP transcription factors function as tr…	ACTCAT, a novel cis-acting element for proline- and hypoosmolarity-responsive expression of the ProDH gene encoding proline dehydrogenase in Arabidopsis.
BOXIINTPATPB	0	2	3	0	0	0	1	0	1	0	2	1	10	S000296	ATAGAA	"Box II" found in the tobacco (N.t.) plastid atpB gene promoter; Conserved in several NCII (nonconsensus type II) promoters of plastid genes; Important for the activity of this NCII promoter; See S000295;	Identification of two essential sequence elements in the nonconsensus type II PatpB-290 plastid promoter by using plastid transcription extracts from cultured tobacco BY-2 cells
TATABOX2	0	0	0	1	2	2	0	3	0	1	0	0	9	S000109	TATAAAT	"TATA box"; TATA box found in the 5'upstream region of pea legA gene; sporamin A of sweet potato; TATA box found in beta-phaseolin promoter (Grace et al.); sequence and spacing of TATA box elements are critical for accurate initiation (Grace et al.);	Sequences responsible for the tissue specific promoter activity of a pea legumin gene in tobacco.
TATABOX4	1	1	1	1	0	1	2	0	0	0	2	0	9	S000111	TATATAA	"TATA box"; TATA box found in the 5'upstream region of sweet potato sporamin A gene; TATA box found in beta-phaseolin promoter (Grace et al.); sequence and spacing of TATA box elements are critical for accurate initiation (Grace et al.);	Sequence and spacing of TATA box elements are critical for accurate initiation from the beta-phaseolin promoter.
DRE2COREZMRAB17	0	1	0	0	2	4	0	0	0	0	0	2	9	S000402	ACCGAC	"DRE2" core found in maize (Z.M.) rab17 gene promoter; "DBF1" and "DBF2" bound to "DRE2"; rab17 is expressed during late embryogenesis, and is induced by ABA; See S000150, S000200 and S000401;	Regulatory elements in vivo in the promoter of the abscisic acid responsive gene rab17 from maize
BS1EGCCR	0	1	1	2	1	0	1	1	0	0	1	1	9	S000352	AGCGGG	"BS1 (binding site 1)" found in E. gunnii Cinnamoyl-CoA reductase (CCR) gene promoter; nuclear protein binding site; Required for vascular expression;	Characterization of cis-elements required for vascular expression of the cinnamoyl CoA reductase gene and for protein-DNA complex formation
SEF3MOTIFGM	3	0	1	0	0	1	0	1	1	0	0	1	8	S000115	AACCCA	"SEF3 binding site"; Soybean (G.m.) consensus sequence found in the 5' upstream region of beta-conglycinin (7S globulin) gene; AACCCA(-27bp-)AACCCA; SEF=soybean embryo factor; SEF2; SEF3; SEF4;	Nuclear factors interact with a soybean beta-conglycinin enhancer.
BOXIIPCCHS	0	0	0	1	1	0	0	4	0	1	1	0	8	S000229	ACGTGGC	Core of "Box II/G box" found in the parsley (P.c.) chs genes; Essential for light regulation (Terzaghi & Cashmore, 1995); See S000345;	Functional borders, genetic fine structure, and distance requirements of cis elements mediating light responsiveness of the parsley chalcone synthase promoter
WBBOXPCWRKY1	0	0	0	1	1	0	0	6	0	0	0	0	8	S000310	TTTGACY	"WB box"; WRKY proteins bind specifically to the DNA sequence motif (T)(T)TGAC(C/T), which is known as the W box; Found in amylase gene in sweet potato, alpha-Amy2 genes in wheat, barley, and wild oat, PR1 gene in parsley, and a transcription factor gene in Arabidopsis; The motif was initially registered in PLACEdb as TTGACT, and was corrected to TTGACY on 22 June, 2006; Y=C/T;	Characterization of a cDNA encoding a novel DNA-binding protein, SPF1, that recognizes SP8 sequences in the 5' upstream regions of genes coding for sporamin and beta-amylase from sweet potato.
ABREOSRAB21	0	1	1	3	0	1	0	0	0	0	1	1	8	S000012	ACGTSSSC	"ABA responsive element (ABRE)" of wheat Em and rice (O.s.) rab21 genes; Proposed consensus sequence for the repeated motif (Em1a and Em1b) of wheat Em gene; S=C/G;	Abscisic acid-responsive sequences from the Em gene of wheat.
ANAERO1CONSENSUS	1	1	0	0	1	0	0	1	3	0	0	1	8	S000477	AAACAAA	One of 16 motifs found in silico in promoters of 13 anaerobic genes involved in the fermentative pathway (anaerobic set 1)(Mohanty et al., 2005); Arbitrary named ANAERO1CONSENSUS by the PLACEdb curator; See also S000478, S000479, S000480, S000481;	Detection and preliminary analysis of motifs in promoters of anaerobically induced genes of different plant species.
CPBCSPOR	0	3	1	0	1	1	0	0	1	0	1	0	8	S000491	TATTAG	The sequence critical for Cytokinin-enhanced Protein Binding in vitro, found in -490 to -340 of the promoter of the cucumber (CS) POR (NADPH-protochlorophyllide reductase) gene;	Identification of a Novel Cis-Element Exhibiting Cytokinin-Dependent Protein Binding in Vitro in the 5'-region of NADPH-Protochlorophyllide Oxidoreductase Gene in Cucumber.
MARTBOX	0	2	0	0	0	1	2	0	1	0	1	1	8	S000067	TTWTWTTWTT	"T-Box"; Motif found in SAR (scaffold attachment region; or matrix attachment region, MAR);	Studies on scaffold attachment sites and their relation to genome function.
RAV1BAT	1	0	0	1	0	1	0	0	0	2	0	2	7	S000315	CACCTG	Binding consensus sequence of an Arabidopsis (A.t.) transcription factor, RAV1; RAV1 specifically binds to DNA with bipartite sequence motifs of RAV1-A (CAACA) and RAV1-B (CACCTG); RAV1 protein contain AP2-like and B3-like domains; The AP2-like and B3-like domains recognize the CAACA and CACCTG motifs, respectively; The expression level of RAV1 were relatively high in rosette leaves and roots; Se…	RAV1, a novel DNA-binding protein, binds to bipartite recognition sequence through two distinct DNA-binding domains uniquely found in higher plants
ARFAT	1	0	1	1	0	0	0	0	1	1	2	0	7	S000270	TGTCTC	ARF (auxin response factor) binding site found in the promoters of primary/early auxin response genes of Arabidopsis thaliana (A.t.); AuxRE; See S000337; Binding site of Arabidopsis ARF1 (Auxin response factor1); Sequence found in NDE element in Soybean (G.m.) SAUR (Small Auxin-Up RNA) 15A gene promoter; See S000359, S000360; Found in D1 or D4 element in Soybean (G.m.) GH3 promoter; This element …	Dimerization and DNA binding of auxin response factors
RBCSCONSENSUS	3	0	0	0	0	0	0	2	0	2	0	0	7	S000127	AATCCAA	"rbcS general consensus sequence"; AATCCAA or AATCCAAC;	Organization and expression of the genes encoding ribulose-1,5-bisphosphate carboxylase in higher plants.
TGACGTVMAMY	0	0	0	0	0	2	0	4	1	0	0	0	7	S000377	TGACGT	"TGACGT motif" found in the Vigna mungo (V.m.) alpha-Amylase (Amy) gene promoter; Located between -128 and -123; Required for high level expression of alpha-Amylase in the cotyledons of the germinated seeds; See S000234;	A TGACGT Motif in the 5'-Upstream Region of alpha-Amylase Gene from Vigna mungo is a cis-Element for Expression in Cotyledons of Germinated Seeds
MYB2AT	0	2	1	0	0	0	3	0	0	0	0	1	7	S000177	TAACTG	Binding site for ATMYB2, an Arabidopsis MYB homolog; ATMYB2 binds oligonucleotides that contained a consensus MYB recognition sequence (TAACTG), such as is in the SV40 enhancer and the maize bronze-1 promoter (Urao et al., Plant Cell 5:1529 (1993)); ATMYB2 is involved in regulation of genes that are responsive to water stress in Arabidopsis; See S000355;	An Arabidopsis myb homolog is induced by dehydration stress and its gene product binds to the conserved MYB recognition sequence
INTRONLOWER	0	0	0	1	1	1	0	0	0	0	2	1	6	S000086	TGCAGG	"3' intron-exon splice junctions"; Plant intron lower sequence; Consensus sequence for plant introns;	A catalog of splice junction and putative branch point sequences from plant introns.
ELRECOREPCRP1	0	0	0	2	1	0	0	1	2	0	0	0	6	S000142	TTGACC	ElRE (Elicitor Responsive Element) core of parsley (P.c.) PR1 genes; consensus sequence of elements W1 and W2 of parsley PR1-1 and PR1-2 promoters; Box W1 and W2 are the binding site of WRKY1 and WRKY2, respectively; ERE; "WA box"; One of the W boxes found in the Parsley (P.c.) WRKY1 gene promoter; Required for elicitor responsiveness; See S000310; "WC box" WB box (S000310) and WC box constitute …	Interaction of elicitor-induced DNA-binding proteins with elicitor response elements in the promoters of parsley PR1 genes.
CACGTGMOTIF	0	0	2	2	0	0	0	2	0	0	0	0	6	S000042	CACGTG	"CACGTG motif"; "G-box"; Binding site of Arabidopsis GBF4; C. roseus G-box binding factor 1 (CrGBF1) and 1 (CrGBF2) can act as transcriptional repressors of the Str promoter via direct interaction with the G-box; See S000345; Essential for expression of beta-phaseolin gene during embryogenesis in bean, tobacco, Arabidopsis; Tomato Pti4 (ERF) regulates defense-related gene expression via GCC box a…	Module-specific regulation of the beta-phaseolin promoter during embryogenesis.
MYB1LEPR	0	0	1	1	0	0	1	3	0	0	0	0	6	S000443	GTTAGTT	Tomato Pti4(ERF) regulates defence-related gene expression via GCC box and non-GCC box cis elements (Myb1(GTTAGTT), G box (CACGTG));	The tomato transcription factor Pti4 regulates defence-related gene expression via GCC box and non-GCC box cis elements
AGCBOXNPGLB	0	2	0	1	1	1	0	0	0	1	0	0	6	S000232	AGCCGCC	"AGC box" repeated twice in a 61 bp enhancer element in tobacco (N.p.) class I beta-1,3-glucanase (GLB) gene; See S000036, S000089; "GCC-box"; Binding sequence of Arabidopsis AtERFs; AtERF1,2 and 5 functioned as activators of GCC box-dependent transcription; AtERF3 and 4 acted as repressors; AtERF proteins are stress signal-response factors; EREBP2 binding site; Conserved in most PR-protein genes…	A 61 bp enhancer element of the tobacco beta-1,3-glucanase B gene interacts with one or more regulated nuclear proteins
SEBFCONSSTPR10A	1	0	0	1	1	0	0	0	0	1	0	1	5	S000391	YTGTCWC	Binding site of the potato silencing element binding factor (SEBF) gene found in promoter of pathogenesis-related gene (PR-10a); Located between -45 and -39; Similar to the auxin response element; W=A/T;	Repression of the defense gene PR-10a by the single-stranded DNA binding protein SEBF
2SSEEDPROTBANAPA	0	0	1	0	0	1	0	0	1	0	2	0	5	S000143	CAAACAC	Conserved in many storage-protein gene promoters; May be important for high activity of the napA promoter;	Disruption of an overlapping E-box/ABRE motif abolished high transcription of the napA storage-protein promoter in transgenic Brassica napus seeds.
POLASIG2	0	0	0	0	0	1	0	3	1	0	0	0	5	S000081	AATTAAA	"PolyA signal"; poly A signal found in rice alpha-amylase; -10 to -30 in the case of animal genes. AATAAA; AATAAT; AATTAAA; AATAAG;	The alpha-amylase genes in Oryza sativa: Characterization of cDNA clones and mRNA expression during seed germination.
ERELEE4	1	1	1	1	1	0	0	0	0	0	0	0	5	S000037	AWTTCAAA	"ERE (ethylene responsive element)" of tomato (L.e.) E4 and carnation GST1 genes; GST1 is related to senescence; Found in the 5'-LTR region of TLC1.1 retrotransposon family in Lycopersicon chilense (Tapia et al.); ERE motifs mediate ethylene-induced activation of the U3 promoter region;	An ethylene-responsive enhancer element is involved in the senescence-related expression of the carnation glutathione-S-transferase (GSTI) gene.
S1FBOXSORPS1L21	0	1	1	0	0	0	1	1	0	0	1	0	5	S000223	ATGGTA	"S1F box" conserved both in spinach (S.o.) RPS1 and RPL21 genes encoding the plastid ribosomal protein S1 and L21, respectively; Negative element; Might play a role in downregulating RPS1 and RPL21 promoter activity (Lagrange et al., 1993); See S000211 (SITE1SORPS1), S000215 (S1FSORPL21);	Sequence specific interaction between S1F, a spinach nuclear factor, and a negative cis-element conserved in plastid-related genes
CCA1ATLHCB1	2	1	0	0	0	0	0	2	0	0	0	0	5	S000149	AAMAATCT	CCA1 binding site; CCA1 protein (myb-related transcription factor) interact with two imperfect repeats of AAMAATCT in Lhcb1*3 gene of Arabidopsis thaliana (A.t.); Related to regulation by phytochrome;	A myb-related transcription factor is involved in the phytochrome regulation of an Arabidopsis Lhcb gene.
GT1CORE	1	0	1	0	0	0	2	0	0	0	0	0	4	S000125	GGTTAA	Critical for GT-1 binding to box II of rbcS; See S000051 GT1MOTIF1; For a compilation of related GT elements and factors, see Villain et al. (1996);	Binding site requirements for pea nuclear protein factor GT-1 correlate with sequences required for light-dependent transcriptional activation of the rbcS-3A gene.
RYREPEATGMGY2	0	0	0	0	0	0	0	0	0	0	1	3	4	S000105	CATGCAT	"RY repeat motif (CATGCAT)"; Present in the 5' region of the soybean (G.m.) glycinin gene (Gy2);	5'-CATGCAT-3' elements modulate the expression of glycinin genes.
IRO2OS	0	0	1	1	0	0	0	2	0	0	0	0	4	S000505	CACGTGG	OsIRO2-binding core sequence; "G-box plus G"; Transcription factor OsIRO2 is induced exclusively by Fe deficiency;	Isolation and characterization of IRO2, a novel iron-regulated bHLH transcription factor in graminaceous plants.
ACGTABREMOTIFAOSOSEM	0	0	0	0	0	1	0	3	0	0	0	0	4	S000281	TACGTGTC	"ABRE motif A" found in the promoter of the rice (O.s.) Osem gene; ACGT-containing ABRE; Required for ABA-responsiveness and VP1 activation; Binding site of TRAB1; Motif A and CE3 (S000282) are functionally equivalent; TRAB1, bZIP transcription factor, interacts with VP1 and mediates abscisic acid-induced transcritption;	ACGT-containing abscisic acid response element (ABRE) and coupling element 3 (CE3) are functionally equivalent
EMBP1TAEM	0	0	0	1	0	0	0	3	0	0	0	0	4	S000119	CACGTGGC	Binding site of trans-acting factor EMBP-1; wheat (T.a.) Em gene; See S000015; Binding site of ABFs; ABFs (ABRE binding factors) were isolated from Arabidopsis by a yeast one-hybrid screening system; Expression ABFs is induced by ABA and various stress treatment; ABFs belongs to a distinct subfamily of bZIP proteins; Involved in ABA-mediated stress-signaling pathway;	A plant leucine zipper protein that recognizes an abscisic acid response element.
CTRMCAMV35S	0	0	0	0	0	0	0	4	0	0	0	0	4	S000460	TCTCTCTCT	CT-rich motif (inverted GAGA) found in a 60-nucleotide region (S1) downstream of the transcription start site of the CaMV 35S RNA; Can enhance gene expression; Inverted GAGA; See also S000405, S000427 (GAGA); (TC)4T;	The cauliflower mosaic virus 35S promoter extends into the transcribed region.
AACACOREOSGLUB1	0	1	0	0	1	0	0	1	0	0	1	0	4	S000353	AACAAAC	Core of AACA motifs found in rice (O.s.) glutelin genes, involved in controlling the endosperm-specific expression; AACA is also closely associated with the GCN4 motif in all rice glutelin genes and together have been shown to confer endosperm-specific enhancement to the truncated -90 CaMV 35S promoter; See also S000045, S000181, S000276;	Quantitative nature of the Prolamin-box, ACGT and AACA motifs in a rice glutelin gene promoter: minimal cis-element requirements for endosperm-specific gene expression
QELEMENTZMZM13	0	2	0	2	0	0	0	0	0	0	0	0	4	S000254	AGGTCA	"Q(quantitative)-element" in maize (Z.m.) ZM13 gene promoter; Found at -107 to -102; Involved in expression enhancing activity; ZM13 is a maize homolog of tomato LAT52 gene; ZM13 is a pollen-specific maize gene;	A monocot pollen-specific promoter contains separable pollen-specific and quantitative elements
PYRIMIDINEBOXHVEPB1	0	0	0	1	0	0	0	0	0	2	0	0	3	S000298	TTTTTTCC	"Pyrimidine box" found in the barley (H.v.) EPB-1 (cysteine proteinase) gene promoter; Located between -120 to -113; Required for GA induction; See S000297, S000259;	Hormonal regulation of a cysteine proteinase gene, EPB-1, in barley aleurone layers: cis- and trans-acting elements involved in the co-ordinated gene expression regulated by gibberellins and abscisic acid
HEXMOTIFTAH3H4	0	0	0	0	0	2	0	0	1	0	0	0	3	S000053	ACGTCA	"hexamer motif" found in promoter of wheat (T.a.) histone genes H3 and H4; CaMV35S; NOS; Binding with HBP-1A and HBP-1B; Binding site of wheat (T.a.) nuclear protein HBP-1 (histone DNA binding protein-1); HBP-1 has a leucine zipper motif; "hexamer motif" in type 1 element may play important roles in regulation of replication- dependent but not of replication-independent expression of the wheat hi…	Nuclear protein(s) binding to the conserved DNA hexameric sequence postulated to regulate transcription of wheat histone genes.
BOXCPSAS1	0	0	0	1	0	0	1	0	1	0	0	0	3	S000226	CTCCCAC	Box C in pea (P.s.) asparagine synthetase (AS1) gene; Found at -45; AS1 is negatively regulated by light; Box C binds with nuclear proteins, which was competed by a putative repressor element RE1 (see S000195);	Light-induced transcriptional repression of the pea AS1 gene: identification of cis-elements and transfactors
ACGTTBOX	0	0	0	0	0	0	0	1	0	0	2	0	3	S000132	AACGTT	"T-box" according to the nomenclature of ACGT elements by Foster et al. (FASEB J 8:192-200 (1994)); One of ACGT elements; See also ACGTABOX (S000130), ACGTCBOX (S000131), and CACGTGMOTIF (S000042);	Plant bZIP Proteins gather at ACGT elements.
GCN4OSGLUB1	0	0	0	0	0	1	0	1	1	0	0	0	3	S000277	TGAGTCA	"GCN4 motif" found in GluB-1 gene in rice (O.s.); Required for endosperm-specific expression; See S000276; AACA and ACGT motifs was found sufficient to confer a detectable level of endosperm expression; See S000353, S000354; This motif is the recognition site for a basic leucine zipper transcription factor that belongs to the group of maize Opaque-2 (O2)-like proteins; Although all the RISBZ prot…	Identification of cis-regulatory elements required for endosperm expression of the rice storage protein glutelin gene GluB-1
PROXBBNNAPA	0	0	0	0	0	1	0	1	1	0	0	0	3	S000263	CAAACACC	"prox B (proximal portion of B-box) found in napA gene of Brassica napus (B.n.); CA-rich sequence; Found between -130 and -124; Required for seed specific expression and ABA responsiveness; See S000262, S000264; dist B ABRE mediated transactivation by ABI3 adn ABI3-dependent response to ABA; a tetramer of the composite RY/G complex mediated only ABA-independent transactivation by ABI3; B2 domain …	Interaction between composite elements in the napA promoter: both the B-box ABA-responsive complex and the RY/G complex are necessary for seed-specific expression
LTREATLTI78	0	0	0	0	1	1	0	1	0	0	0	0	3	S000157	ACCGACA	Putative low temperature responsive element (LTRE); Found in Arabidopsis thaliana (A.t.) low-temperature-induced (lti) genes, lti78 and lti65; Repeated four times in lti78 which is also known as cor78 and rd29A (see S000152)(Baker et al., Plant Mol Biol 24:701(1994)); Found also in barley low temperature responsive genes, blt4.2, blt4.6, blt4.9 (lipid transfer genes); cold inducible; See LTRECORE…	Differential expression of two related, low-temperature-induced genes in Arabidopsis thaliana (L.) Heynh.
CARGNCAT	0	0	0	0	0	2	0	1	0	0	0	0	3	S000446	CCWWWWWWWWGG	Noncanonical CArG motif (CC-Wx8-GG) found in the promoter region of DTA1 (AtGA2ox6); A relevant cis element for the response to AGL15 (AGAMOUS-like 15) in vivo; W=A/T; See S000431 (C-Wx8-G), S000404 (CArG consensus; CC-Wx6-GG);	The embryo MADS domain protein AGAMOUS-Like 15 directly regulates expression of a gene encoding an enzyme involved in gibberellin metabolism.
ABREATCONSENSUS	0	0	0	1	1	0	0	1	0	0	0	0	3	S000406	YACGTGGC	ABA-responsive elements (ABREs) found in the promoter of ABA and/or stress-regulated genes; ABFs, a family of ABRE binding factors; ABF3 and ABF4 function in ABA signaling; Y=C/T;	ABFs, a family of ABA-responsive element binding factors
AMMORESIIUDCRNIA1	0	0	0	0	0	1	0	2	0	0	0	0	3	S000374	GGWAGGGT	Motifs (IIU and IID) found in the Chlamydomonas (C.R.) Nia1 gene promoter; Involved in ammonium-response; Located between -231 and -219 and also between -76 and -65; Involved in Nia1 transcription activation; W=T/A;	Identification of short promoter regions involved in the transcriptional expression of the nitrate reductase gene in Chlamydomonas reinhardtii
GADOWNAT	0	0	0	0	0	1	0	2	0	0	0	0	3	S000438	ACGTGTC	Sequence present in 24 genes in the GA-down regulated d1 cluster (106 genes) found in Arabidopsis seed germination; This motif is similar to ABRE (Busk and Pages 1998);	Gibberellin biosynthesis and response during Arabidopsis seed germination.
-300CORE	0	0	0	0	0	0	0	3	0	0	0	0	3	S000001	TGTAAAG	"TGTAAAG core motif" in "-300 elements" of alpha-zein genes of maize; "-300 element core"; "prolamin box" by Vicente-Carbajosa et al. (Proc Natl Acad Sci USA 94:7685 (1997)); P-box; Binds with P-box binding factor (PBF); Binds with BPBF (Barley PBF); PBF is a DNA-binding protein of the DOF class of transcription factors;	Nucleotide sequence of a B1 hordein gene and the identification of possible upstream regulatory elements in endosperm storage protein genes from barley, wheat and maize.
TATABOXOSPAL	0	1	1	0	0	0	0	0	0	1	0	0	3	S000400	TATTTAA	Binding site for OsTBP2, found in the promoter of rice pal gene encoding phenylalanine ammonia-lyase; OsTFIIB stimulated the DNA binding and bending activities of OsTBP2 and synergistically enhanced OsTBP2-mediated transcription from the pal promoter;	Rice TATA binding protein interacts functionally with transcription factor IIB and the RF2a bZIP transcriptional activator in an enhanced plant in vitro transcription system
AMYBOX1	0	1	1	0	0	0	0	0	1	0	0	0	3	S000020	TAACARA	"amylase box"; Conserved sequence found in 5'-upstream region of alpha-amylase gene of rice, wheat, barley;	Classification and characterization of the rice alpha-amylase multigene family.
GAREAT	0	1	1	0	0	0	0	0	1	0	0	0	3	S000439	TAACAAR	GARE (GA-responsive element); Occurrence of GARE in GA-inducible, GA-responsible, and GA-nonresponsive genes found in Arabidopsis seed germination was 20, 18, and 12%, respectively; see S000181;	Gibberellin biosynthesis and response during Arabidopsis seed germination.
CMSRE1IBSPOA	0	1	0	1	0	0	0	0	0	0	1	0	3	S000511	TGGACGG	CMSRE-1 (Carbohydrate Metabolite Signal Responsive Element 1) found in the promoter of sweet potato (I.b.) sporamin A gene;	Two cis-acting regulatory elements are involved in the sucrose-inducible expression of the sporamin gene promoter from sweet potato in transgenic tobacco.
SEF1MOTIF	0	0	0	0	1	0	0	0	0	1	0	0	2	S000006	ATATTTAWW	"SEF1 (soybean embryo factor 1)" binding motif; sequence found in 5'-upstream region (-640; -765) of soybean beta-conglicinin (7S globulin) gene; W=A/T;	Nuclear factors interact with a soybean beta-conglycinin enhancer.
CAREOSREP1	0	0	0	0	1	0	0	0	0	0	0	1	2	S000421	CAACTC	"CAREs (CAACTC regulatory elements)" found in the promoter region of a cystein proteinase (REP-1) gene in rice;	Two cis-acting elements necessary and sufficient for gibberellin-upregulated proteinase expression in rice seeds
ACGTCBOX	0	0	0	0	0	2	0	0	0	0	0	0	2	S000131	GACGTC	"C-box" according to the nomenclature of ACGT elements by Foster et al. (FASEB J 8:192-200 (1994)); One of ACGT elements; Factors groups 1, 2 and 3 have affinity for C-box (Izawa et al. J Mol Biol. 230:1131-1144 (1993)); RITA-1 binding site (Izawa et al. 1994);	Plant bZIP Proteins gather at ACGT elements.
AUXREPSIAA4	0	0	0	0	0	0	1	1	0	0	0	0	2	S000026	KGTCCCAT	"AuxRE (Auxine responsive element )" of pea (P.s.) PS-IAA4/5 gene; Indoleacetic acid-inducible genes; domain A; TGA1a is preferentially expressed in root tip meristems; TGA1a may contribute to the expression of GST isoenzymes, especially in root tip meristems;	Identification of the auxin-responsive element, AuxRE, in the primary indoleacetic acid-inducible gene, PS-IAA4/5, of pea (Pisum sativum).
L1BOXATPDF1	0	0	0	0	1	0	0	1	0	0	0	0	2	S000386	TAAATGYA	"L1 box" found in promoter of Arabidopsis thaliana (A.t.) PROTODERMAL FACTOR1 (PDF1) gene; Located between -134 and -127; Involved in L1 layer-specific expression; L1-specific homeodomain protein ATML can bind to the "L1 box"; Y=C/T; A cotton fiber gene, RD22-like 1 (RDL1), contains a homeodomain binding L1 box and a MYB binding motif (Wang et al., 2004); HDZip IV; See also S000371;	Identification of a cis-regulatory element for L1 layer-specific gene expression, which is targeted by an L1-specific homeodomain protein
MYBGAHV	0	1	1	0	0	0	0	0	0	0	0	0	2	S000181	TAACAAA	Central element of gibberellin (GA) response complex (GARC) in high-pI alpha-amylase gene in barley (H.v.); Similar to c-myb and v-myb consensus binding site; GAmyb binds specifically to the TAACAAA box in vitro; GAmyb is the sole GA-regulated transcriptional factor required for transcriptional activation of the high-pI alpha-amylase; GARC consist of the pyrimidine, TAACAAA and TATCCAC boxes; GAR…	Gibberellin-regulated expression of a myb gene in barley aleurone cells: evidence for Myb transactivation of a high-pl alpha-amylase gene promoter
UP1ATMSD	0	1	0	0	0	0	0	0	1	0	0	0	2	S000471	GGCCCAWWW	"Up1" motif found in 162 of the 1184 up-regulated genes after main stem decapitation in Arabidopsis; W=A/T; See also S000470, S000472;	Identification of cis-elements that regulate gene expression during initiation of axillary bud outgrowth in Arabidopsis.
TATAPVTRNALEU	0	1	0	1	0	0	0	0	0	0	0	0	2	S000340	TTTATATA	"TATA-like motif"; A TATA-like sequence found in Phaseolus vulgaris tRNALeu gene promoter; Frequently observed upstream of plant tRNA genes; Found in maize glycolytic glyceraldehyde-3-phospate dehydrogenase 4 (GapC4) gene promoter; Binding site of TATA binding protein (TBP);	The TATA motif, the CAA motif and the poly(T) transcription termination motif are all important for transcription re-initiation on plant tRNA genes
TATABOX3	0	0	0	0	0	0	1	0	0	0	0	0	1	S000110	TATTAAT	"TATA box"; TATA box found in the 5'upstream region of sweet potato sporamin A gene;	0
HDZIP2ATATHB2	0	0	0	0	0	0	0	0	0	0	1	0	1	S000373	TAATMATTA	Binding site of the Arabidopsis (A.T.) homeobox gene (ATHB-2) found in its own promoter; Located between -72 and -80; Similar to the HD-ZIP-2 binding consensus sequence; ATHB-2 is regulated by light signals which function as a negative autoregulator of its own gene; M=C/A;	Negative autoregulation of the Arabidopsis homeobox gene ATHB-2
ABREMOTIFAOSOSEM	0	0	0	0	0	1	0	0	0	0	0	0	1	S000299	TACGTGTC	"motif A" ABRE-like sequence found in rice (O.s.) Osem gene promoter; Essential for activation by VP1; Important for regulation by ABA; See S000102, S000300; TRAB1, bZIP transcription factor, interacts with VP1 and mediates abscisic acid-induced transcritption;	Regulation of the Osem gene by abscisic acid and the transcriptional activator VP1: analysis of cis-acting promoter elements required for regulation by abscisic acid and VP1
MRNA3ENDTAH3	0	0	0	0	0	0	0	1	0	0	0	0	1	S000069	AATGGAAATG	Cis element in 3' end region of wheat (T.a.) histone H3 mRNA; 3' end formation; Also found in histone genes of other plants, yeast, etc;	The conserved 3'-flanking sequence, AATGGAAATG, of the wheat histone H3 gene is necessary for the accurate 3'-end formation of mRNA.

## Sheet: Table S3
Table S3 The protein-protein interaction information of maize CNGC protein with other maize proteins
gene1 ID	gene2 ID	gene1 annotation	gene2 annotation	Zm blast to At
				At ID1	At ID2	At name 1	At name 2	gene1 annotation	gene2 annotation	score
ZmCNGC1	GRMZM2G121742	LOC100285094	Annotation not available	AtCNGC1	CNBT1	AT5G53130.1	AT3G17700.1	Cyclic nucleotide gated channel 1; Acts as cyclic nucleotide-gated ion channel. Can be activated by cyclic AMP which leads to an opening of the cation channel. May be responsible for cAMP-induced calcium entry in cells and thus should be involved in the calcium signal transduction. Could transport K(+), Na(+) and Pb(2+)	Cyclic nucleotide gated channel; Probable cyclic nucleotide-gated ion channel	0.921
ZmCNGC1	GRMZM2G129969	LOC100285094	Annotation not available	AtCNGC1	CNGC10	AT5G53130.1	AT1G01340.2	Cyclic nucleotide gated channel 1; Acts as cyclic nucleotide-gated ion channel. Can be activated by cyclic AMP which leads to an opening of the cation channel. May be responsible for cAMP-induced calcium entry in cells and thus should be involved in the calcium signal transduction. Could transport K(+), Na(+) and Pb(2+)	Cyclic nucleotide gated channel; Probable cyclic nucleotide-gated ion channel	0.907	yes
ZmCNGC1	GRMZM2G155720	LOC100285094	Annotation not available	AtCNGC1	CNGC19	AT5G53130.1	AT3G17690.1	Cyclic nucleotide gated channel 1; Acts as cyclic nucleotide-gated ion channel. Can be activated by cyclic AMP which leads to an opening of the cation channel. May be responsible for cAMP-induced calcium entry in cells and thus should be involved in the calcium signal transduction. Could transport K(+), Na(+) and Pb(2+)	Cyclic nucleotide gated channel 19; Putative cyclic nucleotide-gated ion channel	0.91
ZmCNGC1	GRMZM2G158437	LOC100285094	Hypothetical protein LOC100384034	AtCNGC1	CNGC4	AT5G53130.1	AT5G54250.1	Cyclic nucleotide gated channel 1; Acts as cyclic nucleotide-gated ion channel. Can be activated by cyclic AMP which leads to an opening of the cation channel. May be responsible for cAMP-induced calcium entry in cells and thus should be involved in the calcium signal transduction. Could transport K(+), Na(+) and Pb(2+)	Cyclic nucleotide-gated ion channel 4; Acts as cyclic nucleotide-gated ion channel. Permeable to potassium and sodium in a cyclic nucleotide-dependent fashion (cAMP or cGMP). Might constitute a common downstream component of the signaling pathways leading to hypersensitive response (HR)	0.913
ZmCNGC1	GRMZM2G167308	LOC100285094	Annotation not available	AtCNGC1	CNGC5	AT5G53130.1	AT5G57940.1	Cyclic nucleotide gated channel 1; Acts as cyclic nucleotide-gated ion channel. Can be activated by cyclic AMP which leads to an opening of the cation channel. May be responsible for cAMP-induced calcium entry in cells and thus should be involved in the calcium signal transduction. Could transport K(+), Na(+) and Pb(2+)	Cyclic nucleotide gated channel; Probable cyclic nucleotide-gated ion channel	0.908
ZmCNGC1	GRMZM2G448247	LOC100285094	Hypothetical protein LOC100383880	AtCNGC1	DND1	AT5G53130.1	AT5G15410.1	Cyclic nucleotide gated channel 1; Acts as cyclic nucleotide-gated ion channel. Can be activated by cyclic AMP which leads to an opening of the cation channel. May be responsible for cAMP-induced calcium entry in cells and thus should be involved in the calcium signal transduction. Could transport K(+), Na(+) and Pb(2+)	DEFENSE NO DEATH 1; Acts as cyclic nucleotide-gated ion channel. Permeable to potassium and calcium in a cyclic nucleotide-dependent fashion (cAMP or cGMP). Could also transport lithium, cesium and rubium and displays a strong selectivity against sodium. Seems to directly participate in pathogen-induced calcium influx. May function in homeostasis, re-establishing ionic balance after defense actio…	0.916
ZmCNGC1	GRMZM5G813143	LOC100285094	Hypothetical protein LOC100194055	AtCNGC1	EXO70D3	AT5G53130.1	AT3G14090.1	Cyclic nucleotide gated channel 1; Acts as cyclic nucleotide-gated ion channel. Can be activated by cyclic AMP which leads to an opening of the cation channel. May be responsible for cAMP-induced calcium entry in cells and thus should be involved in the calcium signal transduction. Could transport K(+), Na(+) and Pb(2+)	Exocyst complex component 7	0.911
ZmCNGC1	GRMZM2G356938	LOC100285094	Voltage-gated potassium channel beta subunit	AtCNGC1	EXO70E1	AT5G53130.1	AT3G29400.1	Cyclic nucleotide gated channel 1; Acts as cyclic nucleotide-gated ion channel. Can be activated by cyclic AMP which leads to an opening of the cation channel. May be responsible for cAMP-induced calcium entry in cells and thus should be involved in the calcium signal transduction. Could transport K(+), Na(+) and Pb(2+)	Exocyst complex component 7	0.918
ZmCNGC1	GRMZM2G142661	LOC100285094	LOC100280467	AtCNGC1	RABA2c	AT5G53130.1	AT3G46830.1	Cyclic nucleotide gated channel 1; Acts as cyclic nucleotide-gated ion channel. Can be activated by cyclic AMP which leads to an opening of the cation channel. May be responsible for cAMP-induced calcium entry in cells and thus should be involved in the calcium signal transduction. Could transport K(+), Na(+) and Pb(2+)	RAB GTPase homolog A2C; Intracellular vesicle trafficking and protein transport	0.914
ZmCNGC1	GRMZM2G176903	LOC100285094	Hypothetical protein LOC100191240	AtCNGC1	SEC8	AT5G53130.1	AT3G10380.1	Cyclic nucleotide gated channel 1; Acts as cyclic nucleotide-gated ion channel. Can be activated by cyclic AMP which leads to an opening of the cation channel. May be responsible for cAMP-induced calcium entry in cells and thus should be involved in the calcium signal transduction. Could transport K(+), Na(+) and Pb(2+)	Exocyst complex component 4; Component of the exocyst complex involved in the docking of exocytic vesicles with fusion sites on the plasma membrane during regulated or polarized secretion. Involved in polarized cell growth and organ morphogenesis. During cytokinesis, involved in secretory processes during cell plate initiation, cell plate maturation and formation of new primary cell wall	0.906
ZmCNGC2	GRMZM2G121742	Cyclic nucleotide-gated ion channel 1-like	Annotation not available	AtCNGC1	CNBT1	AT5G53130.1	AT3G17700.1	Cyclic nucleotide gated channel 1; Acts as cyclic nucleotide-gated ion channel. Can be activated by cyclic AMP which leads to an opening of the cation channel. May be responsible for cAMP-induced calcium entry in cells and thus should be involved in the calcium signal transduction. Could transport K(+), Na(+) and Pb(2+)	Cyclic nucleotide gated channel; Probable cyclic nucleotide-gated ion channel	0.921
ZmCNGC2	GRMZM2G129969	Cyclic nucleotide-gated ion channel 1-like	Annotation not available	AtCNGC1	CNGC10	AT5G53130.1	AT1G01340.2	Cyclic nucleotide gated channel 1; Acts as cyclic nucleotide-gated ion channel. Can be activated by cyclic AMP which leads to an opening of the cation channel. May be responsible for cAMP-induced calcium entry in cells and thus should be involved in the calcium signal transduction. Could transport K(+), Na(+) and Pb(2+)	Cyclic nucleotide gated channel; Probable cyclic nucleotide-gated ion channel	0.907	yes
ZmCNGC2	GRMZM2G155720	Cyclic nucleotide-gated ion channel 1-like	Annotation not available	AtCNGC1	CNGC19	AT5G53130.1	AT3G17690.1	Cyclic nucleotide gated channel 1; Acts as cyclic nucleotide-gated ion channel. Can be activated by cyclic AMP which leads to an opening of the cation channel. May be responsible for cAMP-induced calcium entry in cells and thus should be involved in the calcium signal transduction. Could transport K(+), Na(+) and Pb(2+)	Cyclic nucleotide gated channel 19; Putative cyclic nucleotide-gated ion channel	0.91
ZmCNGC2	GRMZM2G158437	Cyclic nucleotide-gated ion channel 1-like	Hypothetical protein LOC100384034	AtCNGC1	CNGC4	AT5G53130.1	AT5G54250.1	Cyclic nucleotide gated channel 1; Acts as cyclic nucleotide-gated ion channel. Can be activated by cyclic AMP which leads to an opening of the cation channel. May be responsible for cAMP-induced calcium entry in cells and thus should be involved in the calcium signal transduction. Could transport K(+), Na(+) and Pb(2+)	Cyclic nucleotide-gated ion channel 4; Acts as cyclic nucleotide-gated ion channel. Permeable to potassium and sodium in a cyclic nucleotide-dependent fashion (cAMP or cGMP). Might constitute a common downstream component of the signaling pathways leading to hypersensitive response (HR)	0.913
ZmCNGC2	GRMZM2G167308	Cyclic nucleotide-gated ion channel 1-like	Annotation not available	AtCNGC1	CNGC5	AT5G53130.1	AT5G57940.1	Cyclic nucleotide gated channel 1; Acts as cyclic nucleotide-gated ion channel. Can be activated by cyclic AMP which leads to an opening of the cation channel. May be responsible for cAMP-induced calcium entry in cells and thus should be involved in the calcium signal transduction. Could transport K(+), Na(+) and Pb(2+)	Cyclic nucleotide gated channel; Probable cyclic nucleotide-gated ion channel	0.908
ZmCNGC2	GRMZM2G448247	Cyclic nucleotide-gated ion channel 1-like	Hypothetical protein LOC100383880	AtCNGC1	DND1	AT5G53130.1	AT5G15410.1	Cyclic nucleotide gated channel 1; Acts as cyclic nucleotide-gated ion channel. Can be activated by cyclic AMP which leads to an opening of the cation channel. May be responsible for cAMP-induced calcium entry in cells and thus should be involved in the calcium signal transduction. Could transport K(+), Na(+) and Pb(2+)	DEFENSE NO DEATH 1; Acts as cyclic nucleotide-gated ion channel. Permeable to potassium and calcium in a cyclic nucleotide-dependent fashion (cAMP or cGMP). Could also transport lithium, cesium and rubium and displays a strong selectivity against sodium. Seems to directly participate in pathogen-induced calcium influx. May function in homeostasis, re-establishing ionic balance after defense actio…	0.916
ZmCNGC2	GRMZM5G813143	Cyclic nucleotide-gated ion channel 1-like	Hypothetical protein LOC100194055	AtCNGC1	EXO70D3	AT5G53130.1	AT3G14090.1	Cyclic nucleotide gated channel 1; Acts as cyclic nucleotide-gated ion channel. Can be activated by cyclic AMP which leads to an opening of the cation channel. May be responsible for cAMP-induced calcium entry in cells and thus should be involved in the calcium signal transduction. Could transport K(+), Na(+) and Pb(2+)	Exocyst complex component 7	0.911
ZmCNGC2	GRMZM2G356938	Cyclic nucleotide-gated ion channel 1-like	Voltage-gated potassium channel beta subunit	AtCNGC1	EXO70E1	AT5G53130.1	AT3G29400.1	Cyclic nucleotide gated channel 1; Acts as cyclic nucleotide-gated ion channel. Can be activated by cyclic AMP which leads to an opening of the cation channel. May be responsible for cAMP-induced calcium entry in cells and thus should be involved in the calcium signal transduction. Could transport K(+), Na(+) and Pb(2+)	Exocyst complex component 7	0.918
ZmCNGC2	GRMZM2G142661	Cyclic nucleotide-gated ion channel 1-like	LOC100280467	AtCNGC1	RABA2c	AT5G53130.1	AT3G46830.1	Cyclic nucleotide gated channel 1; Acts as cyclic nucleotide-gated ion channel. Can be activated by cyclic AMP which leads to an opening of the cation channel. May be responsible for cAMP-induced calcium entry in cells and thus should be involved in the calcium signal transduction. Could transport K(+), Na(+) and Pb(2+)	RAB GTPase homolog A2C; Intracellular vesicle trafficking and protein transport	0.914
ZmCNGC2	GRMZM2G176903	Cyclic nucleotide-gated ion channel 1-like	Hypothetical protein LOC100191240	AtCNGC1	SEC8	AT5G53130.1	AT3G10380.1	Cyclic nucleotide gated channel 1; Acts as cyclic nucleotide-gated ion channel. Can be activated by cyclic AMP which leads to an opening of the cation channel. May be responsible for cAMP-induced calcium entry in cells and thus should be involved in the calcium signal transduction. Could transport K(+), Na(+) and Pb(2+)	Exocyst complex component 4; Component of the exocyst complex involved in the docking of exocytic vesicles with fusion sites on the plasma membrane during regulated or polarized secretion. Involved in polarized cell growth and organ morphogenesis. During cytokinesis, involved in secretory processes during cell plate initiation, cell plate maturation and formation of new primary cell wall	0.906
ZmCNGC3	GRMZM2G121742	Uncharacterized protein	Annotation not available	AtCNGC6	CNBT1	AT2G23980.1	AT3G17700.1	Cyclic nucleotide gated channel; Probable cyclic nucleotide-gated ion channel	Cyclic nucleotide gated channel; Probable cyclic nucleotide-gated ion channel	0.91
ZmCNGC3	GRMZM2G129969	Uncharacterized protein	Annotation not available	AtCNGC6	CNGC17	AT2G23980.1	AT4G30360.1	Cyclic nucleotide gated channel; Probable cyclic nucleotide-gated ion channel	Cyclic nucleotide gated channel; Probable cyclic nucleotide-gated ion channel	0.91
ZmCNGC3	GRMZM2G155720	Uncharacterized protein	Annotation not available	AtCNGC6	CNGC4	AT2G23980.1	AT5G54250.1	Cyclic nucleotide gated channel; Probable cyclic nucleotide-gated ion channel	Cyclic nucleotide-gated ion channel 4; Acts as cyclic nucleotide-gated ion channel. Permeable to potassium and sodium in a cyclic nucleotide-dependent fashion (cAMP or cGMP). Might constitute a common downstream component of the signaling pathways leading to hypersensitive response (HR)	0.909
ZmCNGC3	GRMZM2G158437	Uncharacterized protein	Hypothetical protein LOC100384034	AtCNGC6	CNGC5	AT2G23980.1	AT5G57940.1	Cyclic nucleotide gated channel; Probable cyclic nucleotide-gated ion channel	Cyclic nucleotide gated channel; Probable cyclic nucleotide-gated ion channel	0.92
ZmCNGC3	GRMZM2G167308	Uncharacterized protein	Annotation not available	AtCNGC6	DND1	AT2G23980.1	AT5G15410.1	Cyclic nucleotide gated channel; Probable cyclic nucleotide-gated ion channel	DEFENSE NO DEATH 1; Acts as cyclic nucleotide-gated ion channel. Permeable to potassium and calcium in a cyclic nucleotide-dependent fashion (cAMP or cGMP). Could also transport lithium, cesium and rubium and displays a strong selectivity against sodium. Seems to directly participate in pathogen-induced calcium influx. May function in homeostasis, re-establishing ionic balance after defense actio…	0.911
ZmCNGC3	GRMZM2G448247	Uncharacterized protein	Hypothetical protein LOC100383880	AtCNGC6	RABE1c	AT2G23980.1	AT3G46060.1	Cyclic nucleotide gated channel; Probable cyclic nucleotide-gated ion channel	Ras-related protein ARA-3; Involved in membrane trafficking from the Golgi to the plasma membrane	0.91
ZmCNGC3	GRMZM5G813143	Uncharacterized protein	Hypothetical protein LOC100194055	AtCNGC6	SEC10	AT2G23980.1	AT5G12370.1	Cyclic nucleotide gated channel; Probable cyclic nucleotide-gated ion channel	Exocyst complex component 5; Component of the exocyst complex involved in the docking of exocytic vesicles with fusion sites on the plasma membrane during regulated or polarized secretion. Involved in polarized cell growth and organ morphogenesis. During cytokinesis, involved in cell plate initiation, cell plate maturation and formation of new primary cell wall	0.916
ZmCNGC3	GRMZM2G356938	Uncharacterized protein	Voltage-gated potassium channel beta subunit	AtCNGC6	SEC3A	AT2G23980.1	AT1G47550.2	Cyclic nucleotide gated channel; Probable cyclic nucleotide-gated ion channel	Exocyst complex component sec3A; Component of the exocyst complex involved in the docking of exocytic vesicles with fusion sites on the plasma membrane during regulated or polarized secretion. Involved in polarized cell growth and organ morphogenesis. During cytokinesis, involved in cell plate initiation, cell plate maturation and formation of new primary cell wall. During cytokinesis, involved i…	0.913
ZmCNGC3	GRMZM2G142661	Uncharacterized protein	LOC100280467	AtCNGC6	SEC5A	AT2G23980.1	AT1G76850.1	Cyclic nucleotide gated channel; Probable cyclic nucleotide-gated ion channel	Exocyst complex component 2; Component of the exocyst complex involved in the docking of exocytic vesicles with fusion sites on the plasma membrane during regulated or polarized secretion. Involved in polarized cell growth and organ morphogenesis. During cytokinesis, involved in cell plate initiation, cell plate maturation and formation of new primary cell wall. Probable component of an exocyst s…	0.919
ZmCNGC3	GRMZM2G176903	Uncharacterized protein	Hypothetical protein LOC100191240	AtCNGC6	SEC8	AT2G23980.1	AT3G10380.1	Cyclic nucleotide gated channel; Probable cyclic nucleotide-gated ion channel	Exocyst complex component 4; Component of the exocyst complex involved in the docking of exocytic vesicles with fusion sites on the plasma membrane during regulated or polarized secretion. Involved in polarized cell growth and organ morphogenesis. During cytokinesis, involved in secretory processes during cell plate initiation, cell plate maturation and formation of new primary cell wall	0.916
ZmCNGC4	GRMZM2G121742	LOC100281197	Annotation not available	AtCNGC6	CNBT1	AT2G23980.1	AT3G17700.1	Cyclic nucleotide gated channel; Probable cyclic nucleotide-gated ion channel	Cyclic nucleotide gated channel; Probable cyclic nucleotide-gated ion channel	0.91
ZmCNGC4	GRMZM2G129969	LOC100281197	Annotation not available	AtCNGC6	CNGC17	AT2G23980.1	AT4G30360.1	Cyclic nucleotide gated channel; Probable cyclic nucleotide-gated ion channel	Cyclic nucleotide gated channel; Probable cyclic nucleotide-gated ion channel	0.91
ZmCNGC4	GRMZM2G155720	LOC100281197	Annotation not available	AtCNGC6	CNGC4	AT2G23980.1	AT5G54250.1	Cyclic nucleotide gated channel; Probable cyclic nucleotide-gated ion channel	Cyclic nucleotide-gated ion channel 4; Acts as cyclic nucleotide-gated ion channel. Permeable to potassium and sodium in a cyclic nucleotide-dependent fashion (cAMP or cGMP). Might constitute a common downstream component of the signaling pathways leading to hypersensitive response (HR)	0.909
ZmCNGC4	GRMZM2G158437	LOC100281197	Hypothetical protein LOC100384034	AtCNGC6	CNGC5	AT2G23980.1	AT5G57940.1	Cyclic nucleotide gated channel; Probable cyclic nucleotide-gated ion channel	Cyclic nucleotide gated channel; Probable cyclic nucleotide-gated ion channel	0.92
ZmCNGC4	GRMZM2G167308	LOC100281197	Annotation not available	AtCNGC6	DND1	AT2G23980.1	AT5G15410.1	Cyclic nucleotide gated channel; Probable cyclic nucleotide-gated ion channel	DEFENSE NO DEATH 1; Acts as cyclic nucleotide-gated ion channel. Permeable to potassium and calcium in a cyclic nucleotide-dependent fashion (cAMP or cGMP). Could also transport lithium, cesium and rubium and displays a strong selectivity against sodium. Seems to directly participate in pathogen-induced calcium influx. May function in homeostasis, re-establishing ionic balance after defense actio…	0.911
ZmCNGC4	GRMZM2G448247	LOC100281197	Hypothetical protein LOC100383880	AtCNGC6	RABE1c	AT2G23980.1	AT3G46060.1	Cyclic nucleotide gated channel; Probable cyclic nucleotide-gated ion channel	Ras-related protein ARA-3; Involved in membrane trafficking from the Golgi to the plasma membrane	0.91
ZmCNGC4	GRMZM5G813143	LOC100281197	Hypothetical protein LOC100194055	AtCNGC6	SEC10	AT2G23980.1	AT5G12370.1	Cyclic nucleotide gated channel; Probable cyclic nucleotide-gated ion channel	Exocyst complex component 5; Component of the exocyst complex involved in the docking of exocytic vesicles with fusion sites on the plasma membrane during regulated or polarized secretion. Involved in polarized cell growth and organ morphogenesis. During cytokinesis, involved in cell plate initiation, cell plate maturation and formation of new primary cell wall	0.916
ZmCNGC4	GRMZM2G356938	LOC100281197	Voltage-gated potassium channel beta subunit	AtCNGC6	SEC3A	AT2G23980.1	AT1G47550.2	Cyclic nucleotide gated channel; Probable cyclic nucleotide-gated ion channel	Exocyst complex component sec3A; Component of the exocyst complex involved in the docking of exocytic vesicles with fusion sites on the plasma membrane during regulated or polarized secretion. Involved in polarized cell growth and organ morphogenesis. During cytokinesis, involved in cell plate initiation, cell plate maturation and formation of new primary cell wall. During cytokinesis, involved i…	0.913
ZmCNGC4	GRMZM2G142661	LOC100281197	LOC100280467	AtCNGC6	SEC5A	AT2G23980.1	AT1G76850.1	Cyclic nucleotide gated channel; Probable cyclic nucleotide-gated ion channel	Exocyst complex component 2; Component of the exocyst complex involved in the docking of exocytic vesicles with fusion sites on the plasma membrane during regulated or polarized secretion. Involved in polarized cell growth and organ morphogenesis. During cytokinesis, involved in cell plate initiation, cell plate maturation and formation of new primary cell wall. Probable component of an exocyst s…	0.919
ZmCNGC4	GRMZM2G176903	LOC100281197	Hypothetical protein LOC100191240	AtCNGC6	SEC8	AT2G23980.1	AT3G10380.1	Cyclic nucleotide gated channel; Probable cyclic nucleotide-gated ion channel	Exocyst complex component 4; Component of the exocyst complex involved in the docking of exocytic vesicles with fusion sites on the plasma membrane during regulated or polarized secretion. Involved in polarized cell growth and organ morphogenesis. During cytokinesis, involved in secretory processes during cell plate initiation, cell plate maturation and formation of new primary cell wall	0.916
ZmCNGC5	GRMZM2G121742	Uncharacterized protein	Annotation not available	AtCNGC8	ArRABA1h	AT1G19780.1	AT2G33870.1	Cyclic nucleotide gated channel 8; Putative cyclic nucleotide-gated ion channel	RAB GTPase homolog A1H; Intracellular vesicle trafficking and protein transport	0.941
ZmCNGC5	GRMZM2G129969	Uncharacterized protein	Annotation not available	AtCNGC8	CNGC16	AT1G19780.1	AT3G48010.1	Cyclic nucleotide gated channel 8; Putative cyclic nucleotide-gated ion channel	Cyclic nucleotide gated channel; Putative cyclic nucleotide-gated ion channel	0.943
ZmCNGC5	GRMZM2G155720	Uncharacterized protein	Annotation not available	AtCNGC8	CNGC18	AT1G19780.1	AT5G14870.1	Cyclic nucleotide gated channel 8; Putative cyclic nucleotide-gated ion channel	Cyclic nucleotide-gated channel 18; Putative cyclic nucleotide-gated ion channel	0.943
ZmCNGC5	GRMZM2G158437	Uncharacterized protein	Hypothetical protein LOC100384034	AtCNGC8	CNGC7	AT1G19780.1	AT1G15990.1	Cyclic nucleotide gated channel 8; Putative cyclic nucleotide-gated ion channel	Cyclic nucleotide gated channel 7; Putative cyclic nucleotide-gated ion channel	0.926
ZmCNGC5	GRMZM2G167308	Uncharacterized protein	Annotation not available	AtCNGC8	EXO70C1	AT1G19780.1	AT5G13150.1	Cyclic nucleotide gated channel 8; Putative cyclic nucleotide-gated ion channel	Exocyst complex component 7	0.92
ZmCNGC5	GRMZM2G448247	Uncharacterized protein	Hypothetical protein LOC100383880	AtCNGC8	EXO70C2	AT1G19780.1	AT5G13990.1	Cyclic nucleotide gated channel 8; Putative cyclic nucleotide-gated ion channel	Exocyst complex component 7	0.941
ZmCNGC5	GRMZM5G813143	Uncharacterized protein	Hypothetical protein LOC100194055	AtCNGC8	EXO70H3	AT1G19780.1	AT3G09530.1	Cyclic nucleotide gated channel 8; Putative cyclic nucleotide-gated ion channel	Exocyst complex component 7	0.941
ZmCNGC5	GRMZM2G356938	Uncharacterized protein	Voltage-gated potassium channel beta subunit	AtCNGC8	EXO70H5	AT1G19780.1	AT2G28640.1	Cyclic nucleotide gated channel 8; Putative cyclic nucleotide-gated ion channel	Exocyst complex component 7	0.941
ZmCNGC5	GRMZM2G142661	Uncharacterized protein	LOC100280467	AtCNGC8	EXO70H6	AT1G19780.1	AT1G07725.1	Cyclic nucleotide gated channel 8; Putative cyclic nucleotide-gated ion channel	Exocyst complex component 7	0.92
ZmCNGC5	GRMZM2G176903	Uncharacterized protein	Hypothetical protein LOC100191240	AtCNGC8	RABA1i	AT1G19780.1	AT1G28550.1	Cyclic nucleotide gated channel 8; Putative cyclic nucleotide-gated ion channel	RAB GTPase homolog A1I; Intracellular vesicle trafficking and protein transport	0.941
ZmCNGC6	GRMZM2G121742	Hypothetical protein LOC100384835	Annotation not available	AtCNGC14	CNBT1	AT2G24610.1	AT3G17700.1	Cyclic nucleotide gated channel; Probable cyclic nucleotide-gated ion channel	Cyclic nucleotide gated channel; Probable cyclic nucleotide-gated ion channel	0.903
ZmCNGC6	GRMZM2G129969	Hypothetical protein LOC100384835	Annotation not available	AtCNGC14	CNGC1	AT2G24610.1	AT5G53130.1	Cyclic nucleotide gated channel; Probable cyclic nucleotide-gated ion channel	Cyclic nucleotide gated channel 1; Acts as cyclic nucleotide-gated ion channel. Can be activated by cyclic AMP which leads to an opening of the cation channel. May be responsible for cAMP-induced calcium entry in cells and thus should be involved in the calcium signal transduction. Could transport K(+), Na(+) and Pb(2+)	0.902
ZmCNGC6	GRMZM2G155720	Hypothetical protein LOC100384835	Annotation not available	AtCNGC14	CNGC11	AT2G24610.1	AT2G46440.1	Cyclic nucleotide gated channel; Probable cyclic nucleotide-gated ion channel	Cyclic nucleotide-gated channels; Putative cyclic nucleotide-gated ion channel	0.903
ZmCNGC6	GRMZM2G158437	Hypothetical protein LOC100384835	Hypothetical protein LOC100384034	AtCNGC14	CNGC19	AT2G24610.1	AT3G17690.1	Cyclic nucleotide gated channel; Probable cyclic nucleotide-gated ion channel	Cyclic nucleotide gated channel 19; Putative cyclic nucleotide-gated ion channel	0.913
ZmCNGC6	GRMZM2G167308	Hypothetical protein LOC100384835	Annotation not available	AtCNGC14	EXO70B1	AT2G24610.1	AT5G58430.1	Cyclic nucleotide gated channel; Probable cyclic nucleotide-gated ion channel	Exocyst subunit exo70 family protein B1; Component of an exocyst subcomplex specifically involved in autophagy-related, Golgi-independent membrane traffic to the vacuole. Regulates autophagosome formation and autophagy-related Golgi-independent import into the vacuole	0.919
ZmCNGC6	GRMZM2G448247	Hypothetical protein LOC100384835	Hypothetical protein LOC100383880	AtCNGC14	EXO70E1	AT2G24610.1	AT3G29400.1	Cyclic nucleotide gated channel; Probable cyclic nucleotide-gated ion channel	Exocyst complex component 7	0.931
ZmCNGC6	GRMZM5G813143	Hypothetical protein LOC100384835	Hypothetical protein LOC100194055	AtCNGC14	EXO70H7	AT2G24610.1	AT5G59730.1	Cyclic nucleotide gated channel; Probable cyclic nucleotide-gated ion channel	Exocyst subunit exo70 family protein H7	0.92
ZmCNGC6	GRMZM2G356938	Hypothetical protein LOC100384835	Voltage-gated potassium channel beta subunit	AtCNGC14	RABA2c	AT2G24610.1	AT3G46830.1	Cyclic nucleotide gated channel; Probable cyclic nucleotide-gated ion channel	RAB GTPase homolog A2C; Intracellular vesicle trafficking and protein transport	0.937
ZmCNGC6	GRMZM2G142661	Hypothetical protein LOC100384835	LOC100280467	AtCNGC14	SEC3A	AT2G24610.1	AT1G47550.2	Cyclic nucleotide gated channel; Probable cyclic nucleotide-gated ion channel	Exocyst complex component sec3A; Component of the exocyst complex involved in the docking of exocytic vesicles with fusion sites on the plasma membrane during regulated or polarized secretion. Involved in polarized cell growth and organ morphogenesis. During cytokinesis, involved in cell plate initiation, cell plate maturation and formation of new primary cell wall. During cytokinesis, involved i…	0.906
ZmCNGC6	GRMZM2G176903	Hypothetical protein LOC100384835	Hypothetical protein LOC100191240	AtCNGC14	SEC3B	AT2G24610.1	AT1G47560.1	Cyclic nucleotide gated channel; Probable cyclic nucleotide-gated ion channel	Exocyst complex component sec3B; Component of the exocyst complex involved in the docking of exocytic vesicles with fusion sites on the plasma membrane during regulated or polarized secretion. Involved in polarized cell growth and organ morphogenesis. During cytokinesis, involved in cell plate initiation, cell plate maturation and formation of new primary cell wall	0.906
ZmCNGC7	GRMZM2G121742	Putative cyclic nucleotide-gated ion channel 15	Annotation not available	AtCNGC15	CNBT1	AT2G28260.1	AT3G17700.1	Cyclic nucleotide-gated channel 15; Putative cyclic nucleotide-gated ion channel	Cyclic nucleotide gated channel; Probable cyclic nucleotide-gated ion channel	0.903
ZmCNGC7	GRMZM2G129969	Putative cyclic nucleotide-gated ion channel 15	Annotation not available	AtCNGC15	CNGC12	AT2G28260.1	AT2G46450.1	Cyclic nucleotide-gated channel 15; Putative cyclic nucleotide-gated ion channel	Cyclic nucleotide gated channel; Probable cyclic nucleotide-gated ion channel	0.901
ZmCNGC7	GRMZM2G155720	Putative cyclic nucleotide-gated ion channel 15	Annotation not available	AtCNGC15	CNGC13	AT2G28260.1	AT4G01010.1	Cyclic nucleotide-gated channel 15; Putative cyclic nucleotide-gated ion channel	Cyclic nucleotide-gated channel 13; Putative cyclic nucleotide-gated ion channel	0.9
ZmCNGC7	GRMZM2G158437	Putative cyclic nucleotide-gated ion channel 15	Hypothetical protein LOC100384034	AtCNGC15	CNGC16	AT2G28260.1	AT3G48010.1	Cyclic nucleotide-gated channel 15; Putative cyclic nucleotide-gated ion channel	Cyclic nucleotide gated channel; Putative cyclic nucleotide-gated ion channel	0.901
ZmCNGC7	GRMZM2G167308	Putative cyclic nucleotide-gated ion channel 15	Annotation not available	AtCNGC15	CNGC18	AT2G28260.1	AT5G14870.1	Cyclic nucleotide-gated channel 15; Putative cyclic nucleotide-gated ion channel	Cyclic nucleotide-gated channel 18; Putative cyclic nucleotide-gated ion channel	0.901
ZmCNGC7	GRMZM2G448247	Putative cyclic nucleotide-gated ion channel 15	Hypothetical protein LOC100383880	AtCNGC15	CNGC4	AT2G28260.1	AT5G54250.1	Cyclic nucleotide-gated channel 15; Putative cyclic nucleotide-gated ion channel	Cyclic nucleotide-gated ion channel 4; Acts as cyclic nucleotide-gated ion channel. Permeable to potassium and sodium in a cyclic nucleotide-dependent fashion (cAMP or cGMP). Might constitute a common downstream component of the signaling pathways leading to hypersensitive response (HR)	0.901
ZmCNGC7	GRMZM5G813143	Putative cyclic nucleotide-gated ion channel 15	Hypothetical protein LOC100194055	AtCNGC15	CNGC5	AT2G28260.1	AT5G57940.1	Cyclic nucleotide-gated channel 15; Putative cyclic nucleotide-gated ion channel	Cyclic nucleotide gated channel; Probable cyclic nucleotide-gated ion channel	0.901
ZmCNGC7	GRMZM2G356938	Putative cyclic nucleotide-gated ion channel 15	Voltage-gated potassium channel beta subunit	AtCNGC15	CNGC6	AT2G28260.1	AT2G23980.1	Cyclic nucleotide-gated channel 15; Putative cyclic nucleotide-gated ion channel	Cyclic nucleotide gated channel; Probable cyclic nucleotide-gated ion channel	0.901
ZmCNGC7	GRMZM2G142661	Putative cyclic nucleotide-gated ion channel 15	LOC100280467	AtCNGC15	SEC3A	AT2G28260.1	AT1G47550.2	Cyclic nucleotide-gated channel 15; Putative cyclic nucleotide-gated ion channel	Exocyst complex component sec3A; Component of the exocyst complex involved in the docking of exocytic vesicles with fusion sites on the plasma membrane during regulated or polarized secretion. Involved in polarized cell growth and organ morphogenesis. During cytokinesis, involved in cell plate initiation, cell plate maturation and formation of new primary cell wall. During cytokinesis, involved i…	0.906
ZmCNGC7	GRMZM2G176903	Putative cyclic nucleotide-gated ion channel 15	Hypothetical protein LOC100191240	AtCNGC15	SEC3B	AT2G28260.1	AT1G47560.1	Cyclic nucleotide-gated channel 15; Putative cyclic nucleotide-gated ion channel	Exocyst complex component sec3B; Component of the exocyst complex involved in the docking of exocytic vesicles with fusion sites on the plasma membrane during regulated or polarized secretion. Involved in polarized cell growth and organ morphogenesis. During cytokinesis, involved in cell plate initiation, cell plate maturation and formation of new primary cell wall	0.906
ZmCNGC8	GRMZM2G078781	LOC100286178	Hypothetical protein LOC100273558	AtCNGC17	ARA-2	AT4G30360.1	AT1G06400.1	Cyclic nucleotide gated channel; Probable cyclic nucleotide-gated ion channel	Ras-related protein RABA1a; Involved in auxin-mediated response. May be involved in vesicle trafficking of components involved in polar auxin transport. Binds GTP and GDP and possesses intrinsic GTPase activity	0.907
ZmCNGC8	GRMZM2G155720	LOC100286178	Annotation not available	AtCNGC17	CNGC18	AT4G30360.1	AT5G14870.1	Cyclic nucleotide gated channel; Probable cyclic nucleotide-gated ion channel	Cyclic nucleotide-gated channel 18; Putative cyclic nucleotide-gated ion channel	0.907	yes
ZmCNGC8	GRMZM2G158437	LOC100286178	Hypothetical protein LOC100384034	AtCNGC17	CNGC6	AT4G30360.1	AT2G23980.1	Cyclic nucleotide gated channel; Probable cyclic nucleotide-gated ion channel	Cyclic nucleotide gated channel; Probable cyclic nucleotide-gated ion channel	0.91
ZmCNGC8	GRMZM2G167308	LOC100286178	Annotation not available	AtCNGC17	EXO70D2	AT4G30360.1	AT1G54090.1	Cyclic nucleotide gated channel; Probable cyclic nucleotide-gated ion channel	Exocyst complex component 7	0.906
ZmCNGC8	GRMZM2G448247	LOC100286178	Hypothetical protein LOC100383880	AtCNGC17	EXO70F1	AT4G30360.1	AT5G50380.1	Cyclic nucleotide gated channel; Probable cyclic nucleotide-gated ion channel	Exocyst complex component 7	0.91
ZmCNGC8	GRMZM5G813143	LOC100286178	Hypothetical protein LOC100194055	AtCNGC17	EXO70G1	AT4G30360.1	AT4G31540.1	Cyclic nucleotide gated channel; Probable cyclic nucleotide-gated ion channel	Exocyst complex component 7	0.906
ZmCNGC8	ZmCNGC10	LOC100286178	Hypothetical protein LOC100191751	AtCNGC17	SEC15B	AT4G30360.1	AT4G02350.1	Cyclic nucleotide gated channel; Probable cyclic nucleotide-gated ion channel	Exocyst complex component sec15B; Component of the exocyst complex involved in the docking of exocytic vesicles with fusion sites on the plasma membrane during regulated or polarized secretion. Involved in polarized cell growth and organ morphogenesis. During cytokinesis, involved in cell plate initiation, cell plate maturation and formation of new primary cell wall	0.913
ZmCNGC8	GRMZM2G356938	LOC100286178	Voltage-gated potassium channel beta subunit	AtCNGC17	SEC3A	AT4G30360.1	AT1G47550.2	Cyclic nucleotide gated channel; Probable cyclic nucleotide-gated ion channel	Exocyst complex component sec3A; Component of the exocyst complex involved in the docking of exocytic vesicles with fusion sites on the plasma membrane during regulated or polarized secretion. Involved in polarized cell growth and organ morphogenesis. During cytokinesis, involved in cell plate initiation, cell plate maturation and formation of new primary cell wall. During cytokinesis, involved i…	0.917
ZmCNGC8	GRMZM2G142661	LOC100286178	LOC100280467	AtCNGC17	SEC3B	AT4G30360.1	AT1G47560.1	Cyclic nucleotide gated channel; Probable cyclic nucleotide-gated ion channel	Exocyst complex component sec3B; Component of the exocyst complex involved in the docking of exocytic vesicles with fusion sites on the plasma membrane during regulated or polarized secretion. Involved in polarized cell growth and organ morphogenesis. During cytokinesis, involved in cell plate initiation, cell plate maturation and formation of new primary cell wall	0.906
ZmCNGC8	GRMZM2G176903	LOC100286178	Hypothetical protein LOC100191240	AtCNGC17	SEC8	AT4G30360.1	AT3G10380.1	Cyclic nucleotide gated channel; Probable cyclic nucleotide-gated ion channel	Exocyst complex component 4; Component of the exocyst complex involved in the docking of exocytic vesicles with fusion sites on the plasma membrane during regulated or polarized secretion. Involved in polarized cell growth and organ morphogenesis. During cytokinesis, involved in secretory processes during cell plate initiation, cell plate maturation and formation of new primary cell wall	0.906
ZmCNGC9	GRMZM2G121742	Probable cyclic nucleotide-gated ion channel 20, chloroplastic	Annotation not available	AtCNGC17	ARA-2	AT4G30360.1	AT1G06400.1	Cyclic nucleotide gated channel; Probable cyclic nucleotide-gated ion channel	Ras-related protein RABA1a; Involved in auxin-mediated response. May be involved in vesicle trafficking of components involved in polar auxin transport. Binds GTP and GDP and possesses intrinsic GTPase activity	0.907
ZmCNGC9	GRMZM2G129969	Probable cyclic nucleotide-gated ion channel 20, chloroplastic	Annotation not available	AtCNGC17	CNGC18	AT4G30360.1	AT5G14870.1	Cyclic nucleotide gated channel; Probable cyclic nucleotide-gated ion channel	Cyclic nucleotide-gated channel 18; Putative cyclic nucleotide-gated ion channel	0.907
ZmCNGC9	GRMZM2G155720	Probable cyclic nucleotide-gated ion channel 20, chloroplastic	Annotation not available	AtCNGC17	CNGC6	AT4G30360.1	AT2G23980.1	Cyclic nucleotide gated channel; Probable cyclic nucleotide-gated ion channel	Cyclic nucleotide gated channel; Probable cyclic nucleotide-gated ion channel	0.91
ZmCNGC9	GRMZM2G158437	Probable cyclic nucleotide-gated ion channel 20, chloroplastic	Hypothetical protein LOC100384034	AtCNGC17	EXO70D2	AT4G30360.1	AT1G54090.1	Cyclic nucleotide gated channel; Probable cyclic nucleotide-gated ion channel	Exocyst complex component 7	0.906
ZmCNGC9	GRMZM2G167308	Probable cyclic nucleotide-gated ion channel 20, chloroplastic	Annotation not available	AtCNGC17	EXO70F1	AT4G30360.1	AT5G50380.1	Cyclic nucleotide gated channel; Probable cyclic nucleotide-gated ion channel	Exocyst complex component 7	0.91
ZmCNGC9	GRMZM2G448247	Probable cyclic nucleotide-gated ion channel 20, chloroplastic	Hypothetical protein LOC100383880	AtCNGC17	EXO70G1	AT4G30360.1	AT4G31540.1	Cyclic nucleotide gated channel; Probable cyclic nucleotide-gated ion channel	Exocyst complex component 7	0.906
ZmCNGC9	GRMZM5G813143	Probable cyclic nucleotide-gated ion channel 20, chloroplastic	Hypothetical protein LOC100194055	AtCNGC17	SEC15B	AT4G30360.1	AT4G02350.1	Cyclic nucleotide gated channel; Probable cyclic nucleotide-gated ion channel	Exocyst complex component sec15B; Component of the exocyst complex involved in the docking of exocytic vesicles with fusion sites on the plasma membrane during regulated or polarized secretion. Involved in polarized cell growth and organ morphogenesis. During cytokinesis, involved in cell plate initiation, cell plate maturation and formation of new primary cell wall	0.913
ZmCNGC9	GRMZM2G356938	Probable cyclic nucleotide-gated ion channel 20, chloroplastic	Voltage-gated potassium channel beta subunit	AtCNGC17	SEC3A	AT4G30360.1	AT1G47550.2	Cyclic nucleotide gated channel; Probable cyclic nucleotide-gated ion channel	Exocyst complex component sec3A; Component of the exocyst complex involved in the docking of exocytic vesicles with fusion sites on the plasma membrane during regulated or polarized secretion. Involved in polarized cell growth and organ morphogenesis. During cytokinesis, involved in cell plate initiation, cell plate maturation and formation of new primary cell wall. During cytokinesis, involved i…	0.917
ZmCNGC9	GRMZM2G142661	Probable cyclic nucleotide-gated ion channel 20, chloroplastic	LOC100280467	AtCNGC17	SEC3B	AT4G30360.1	AT1G47560.1	Cyclic nucleotide gated channel; Probable cyclic nucleotide-gated ion channel	Exocyst complex component sec3B; Component of the exocyst complex involved in the docking of exocytic vesicles with fusion sites on the plasma membrane during regulated or polarized secretion. Involved in polarized cell growth and organ morphogenesis. During cytokinesis, involved in cell plate initiation, cell plate maturation and formation of new primary cell wall	0.906
ZmCNGC9	GRMZM2G176903	Probable cyclic nucleotide-gated ion channel 20, chloroplastic	Hypothetical protein LOC100191240	AtCNGC17	SEC8	AT4G30360.1	AT3G10380.1	Cyclic nucleotide gated channel; Probable cyclic nucleotide-gated ion channel	Exocyst complex component 4; Component of the exocyst complex involved in the docking of exocytic vesicles with fusion sites on the plasma membrane during regulated or polarized secretion. Involved in polarized cell growth and organ morphogenesis. During cytokinesis, involved in secretory processes during cell plate initiation, cell plate maturation and formation of new primary cell wall	0.906
ZmCNGC10	GRMZM2G078781	Hypothetical protein LOC100191751	Hypothetical protein LOC100273558	DND1	CNBT1	AT5G15410.1	AT3G17700.1	DEFENSE NO DEATH 1; Acts as cyclic nucleotide-gated ion channel. Permeable to potassium and calcium in a cyclic nucleotide-dependent fashion (cAMP or cGMP). Could also transport lithium, cesium and rubium and displays a strong selectivity against sodium. Seems to directly participate in pathogen-induced calcium influx. May function in homeostasis, re-establishing ionic balance after defense actio…	Cyclic nucleotide gated channel; Probable cyclic nucleotide-gated ion channel	0.912
ZmCNGC10	GRMZM2G155720	Hypothetical protein LOC100191751	Annotation not available	DND1	CNGC1	AT5G15410.1	AT5G53130.1	DEFENSE NO DEATH 1; Acts as cyclic nucleotide-gated ion channel. Permeable to potassium and calcium in a cyclic nucleotide-dependent fashion (cAMP or cGMP). Could also transport lithium, cesium and rubium and displays a strong selectivity against sodium. Seems to directly participate in pathogen-induced calcium influx. May function in homeostasis, re-establishing ionic balance after defense actio…	Cyclic nucleotide gated channel 1; Acts as cyclic nucleotide-gated ion channel. Can be activated by cyclic AMP which leads to an opening of the cation channel. May be responsible for cAMP-induced calcium entry in cells and thus should be involved in the calcium signal transduction. Could transport K(+), Na(+) and Pb(2+)	0.916
ZmCNGC10	GRMZM2G158437	Hypothetical protein LOC100191751	Hypothetical protein LOC100384034	DND1	CNGC11	AT5G15410.1	AT2G46440.1	DEFENSE NO DEATH 1; Acts as cyclic nucleotide-gated ion channel. Permeable to potassium and calcium in a cyclic nucleotide-dependent fashion (cAMP or cGMP). Could also transport lithium, cesium and rubium and displays a strong selectivity against sodium. Seems to directly participate in pathogen-induced calcium influx. May function in homeostasis, re-establishing ionic balance after defense actio…	Cyclic nucleotide-gated channels; Putative cyclic nucleotide-gated ion channel	0.918
ZmCNGC10	GRMZM2G167308	Hypothetical protein LOC100191751	Annotation not available	DND1	CNGC12	AT5G15410.1	AT2G46450.1	DEFENSE NO DEATH 1; Acts as cyclic nucleotide-gated ion channel. Permeable to potassium and calcium in a cyclic nucleotide-dependent fashion (cAMP or cGMP). Could also transport lithium, cesium and rubium and displays a strong selectivity against sodium. Seems to directly participate in pathogen-induced calcium influx. May function in homeostasis, re-establishing ionic balance after defense actio…	Cyclic nucleotide gated channel; Probable cyclic nucleotide-gated ion channel	0.917
ZmCNGC10	GRMZM2G448247	Hypothetical protein LOC100191751	Hypothetical protein LOC100383880	DND1	CNGC19	AT5G15410.1	AT3G17690.1	DEFENSE NO DEATH 1; Acts as cyclic nucleotide-gated ion channel. Permeable to potassium and calcium in a cyclic nucleotide-dependent fashion (cAMP or cGMP). Could also transport lithium, cesium and rubium and displays a strong selectivity against sodium. Seems to directly participate in pathogen-induced calcium influx. May function in homeostasis, re-establishing ionic balance after defense actio…	Cyclic nucleotide gated channel 19; Putative cyclic nucleotide-gated ion channel	0.912
ZmCNGC10	GRMZM5G813143	Hypothetical protein LOC100191751	Hypothetical protein LOC100194055	DND1	CNGC3	AT5G15410.1	AT2G46430.1	DEFENSE NO DEATH 1; Acts as cyclic nucleotide-gated ion channel. Permeable to potassium and calcium in a cyclic nucleotide-dependent fashion (cAMP or cGMP). Could also transport lithium, cesium and rubium and displays a strong selectivity against sodium. Seems to directly participate in pathogen-induced calcium influx. May function in homeostasis, re-establishing ionic balance after defense actio…	Cyclic nucleotide gated channel; Probable cyclic nucleotide-gated ion channel	0.911
ZmCNGC10	GRMZM2G356938	Hypothetical protein LOC100191751	Voltage-gated potassium channel beta subunit	DND1	CNGC4	AT5G15410.1	AT5G54250.1	DEFENSE NO DEATH 1; Acts as cyclic nucleotide-gated ion channel. Permeable to potassium and calcium in a cyclic nucleotide-dependent fashion (cAMP or cGMP). Could also transport lithium, cesium and rubium and displays a strong selectivity against sodium. Seems to directly participate in pathogen-induced calcium influx. May function in homeostasis, re-establishing ionic balance after defense actio…	Cyclic nucleotide-gated ion channel 4; Acts as cyclic nucleotide-gated ion channel. Permeable to potassium and sodium in a cyclic nucleotide-dependent fashion (cAMP or cGMP). Might constitute a common downstream component of the signaling pathways leading to hypersensitive response (HR)	0.911
ZmCNGC10	ZmCNGC8	Hypothetical protein LOC100191751	LOC100286178	DND1	CNGC5	AT5G15410.1	AT5G57940.1	DEFENSE NO DEATH 1; Acts as cyclic nucleotide-gated ion channel. Permeable to potassium and calcium in a cyclic nucleotide-dependent fashion (cAMP or cGMP). Could also transport lithium, cesium and rubium and displays a strong selectivity against sodium. Seems to directly participate in pathogen-induced calcium influx. May function in homeostasis, re-establishing ionic balance after defense actio…	Cyclic nucleotide gated channel; Probable cyclic nucleotide-gated ion channel	0.91
ZmCNGC10	GRMZM2G142661	Hypothetical protein LOC100191751	LOC100280467	DND1	CNGC6	AT5G15410.1	AT2G23980.1	DEFENSE NO DEATH 1; Acts as cyclic nucleotide-gated ion channel. Permeable to potassium and calcium in a cyclic nucleotide-dependent fashion (cAMP or cGMP). Could also transport lithium, cesium and rubium and displays a strong selectivity against sodium. Seems to directly participate in pathogen-induced calcium influx. May function in homeostasis, re-establishing ionic balance after defense actio…	Cyclic nucleotide gated channel; Probable cyclic nucleotide-gated ion channel	0.911
ZmCNGC10	GRMZM2G176903	Hypothetical protein LOC100191751	Hypothetical protein LOC100191240	DND1	EXO70B1	AT5G15410.1	AT5G58430.1	DEFENSE NO DEATH 1; Acts as cyclic nucleotide-gated ion channel. Permeable to potassium and calcium in a cyclic nucleotide-dependent fashion (cAMP or cGMP). Could also transport lithium, cesium and rubium and displays a strong selectivity against sodium. Seems to directly participate in pathogen-induced calcium influx. May function in homeostasis, re-establishing ionic balance after defense actio…	Exocyst subunit exo70 family protein B1; Component of an exocyst subcomplex specifically involved in autophagy-related, Golgi-independent membrane traffic to the vacuole. Regulates autophagosome formation and autophagy-related Golgi-independent import into the vacuole	0.911
ZmCNGC11	GRMZM2G121742	Hypothetical protein LOC100272382	Annotation not available	DND1	CNBT1	AT5G15410.1	AT3G17700.1	DEFENSE NO DEATH 1; Acts as cyclic nucleotide-gated ion channel. Permeable to potassium and calcium in a cyclic nucleotide-dependent fashion (cAMP or cGMP). Could also transport lithium, cesium and rubium and displays a strong selectivity against sodium. Seems to directly participate in pathogen-induced calcium influx. May function in homeostasis, re-establishing ionic balance after defense actio…	Cyclic nucleotide gated channel; Probable cyclic nucleotide-gated ion channel	0.912
ZmCNGC11	GRMZM2G129969	Hypothetical protein LOC100272382	Annotation not available	DND1	CNGC1	AT5G15410.1	AT5G53130.1	DEFENSE NO DEATH 1; Acts as cyclic nucleotide-gated ion channel. Permeable to potassium and calcium in a cyclic nucleotide-dependent fashion (cAMP or cGMP). Could also transport lithium, cesium and rubium and displays a strong selectivity against sodium. Seems to directly participate in pathogen-induced calcium influx. May function in homeostasis, re-establishing ionic balance after defense actio…	Cyclic nucleotide gated channel 1; Acts as cyclic nucleotide-gated ion channel. Can be activated by cyclic AMP which leads to an opening of the cation channel. May be responsible for cAMP-induced calcium entry in cells and thus should be involved in the calcium signal transduction. Could transport K(+), Na(+) and Pb(2+)	0.916
ZmCNGC11	GRMZM2G155720	Hypothetical protein LOC100272382	Annotation not available	DND1	CNGC11	AT5G15410.1	AT2G46440.1	DEFENSE NO DEATH 1; Acts as cyclic nucleotide-gated ion channel. Permeable to potassium and calcium in a cyclic nucleotide-dependent fashion (cAMP or cGMP). Could also transport lithium, cesium and rubium and displays a strong selectivity against sodium. Seems to directly participate in pathogen-induced calcium influx. May function in homeostasis, re-establishing ionic balance after defense actio…	Cyclic nucleotide-gated channels; Putative cyclic nucleotide-gated ion channel	0.918
ZmCNGC11	GRMZM2G158437	Hypothetical protein LOC100272382	Hypothetical protein LOC100384034	DND1	CNGC12	AT5G15410.1	AT2G46450.1	DEFENSE NO DEATH 1; Acts as cyclic nucleotide-gated ion channel. Permeable to potassium and calcium in a cyclic nucleotide-dependent fashion (cAMP or cGMP). Could also transport lithium, cesium and rubium and displays a strong selectivity against sodium. Seems to directly participate in pathogen-induced calcium influx. May function in homeostasis, re-establishing ionic balance after defense actio…	Cyclic nucleotide gated channel; Probable cyclic nucleotide-gated ion channel	0.917
ZmCNGC11	GRMZM2G167308	Hypothetical protein LOC100272382	Annotation not available	DND1	CNGC19	AT5G15410.1	AT3G17690.1	DEFENSE NO DEATH 1; Acts as cyclic nucleotide-gated ion channel. Permeable to potassium and calcium in a cyclic nucleotide-dependent fashion (cAMP or cGMP). Could also transport lithium, cesium and rubium and displays a strong selectivity against sodium. Seems to directly participate in pathogen-induced calcium influx. May function in homeostasis, re-establishing ionic balance after defense actio…	Cyclic nucleotide gated channel 19; Putative cyclic nucleotide-gated ion channel	0.912
ZmCNGC11	GRMZM2G448247	Hypothetical protein LOC100272382	Hypothetical protein LOC100383880	DND1	CNGC3	AT5G15410.1	AT2G46430.1	DEFENSE NO DEATH 1; Acts as cyclic nucleotide-gated ion channel. Permeable to potassium and calcium in a cyclic nucleotide-dependent fashion (cAMP or cGMP). Could also transport lithium, cesium and rubium and displays a strong selectivity against sodium. Seems to directly participate in pathogen-induced calcium influx. May function in homeostasis, re-establishing ionic balance after defense actio…	Cyclic nucleotide gated channel; Probable cyclic nucleotide-gated ion channel	0.911
ZmCNGC11	GRMZM5G813143	Hypothetical protein LOC100272382	Hypothetical protein LOC100194055	DND1	CNGC4	AT5G15410.1	AT5G54250.1	DEFENSE NO DEATH 1; Acts as cyclic nucleotide-gated ion channel. Permeable to potassium and calcium in a cyclic nucleotide-dependent fashion (cAMP or cGMP). Could also transport lithium, cesium and rubium and displays a strong selectivity against sodium. Seems to directly participate in pathogen-induced calcium influx. May function in homeostasis, re-establishing ionic balance after defense actio…	Cyclic nucleotide-gated ion channel 4; Acts as cyclic nucleotide-gated ion channel. Permeable to potassium and sodium in a cyclic nucleotide-dependent fashion (cAMP or cGMP). Might constitute a common downstream component of the signaling pathways leading to hypersensitive response (HR)	0.911
ZmCNGC11	GRMZM2G356938	Hypothetical protein LOC100272382	Voltage-gated potassium channel beta subunit	DND1	CNGC5	AT5G15410.1	AT5G57940.1	DEFENSE NO DEATH 1; Acts as cyclic nucleotide-gated ion channel. Permeable to potassium and calcium in a cyclic nucleotide-dependent fashion (cAMP or cGMP). Could also transport lithium, cesium and rubium and displays a strong selectivity against sodium. Seems to directly participate in pathogen-induced calcium influx. May function in homeostasis, re-establishing ionic balance after defense actio…	Cyclic nucleotide gated channel; Probable cyclic nucleotide-gated ion channel	0.91
ZmCNGC11	GRMZM2G142661	Hypothetical protein LOC100272382	LOC100280467	DND1	CNGC6	AT5G15410.1	AT2G23980.1	DEFENSE NO DEATH 1; Acts as cyclic nucleotide-gated ion channel. Permeable to potassium and calcium in a cyclic nucleotide-dependent fashion (cAMP or cGMP). Could also transport lithium, cesium and rubium and displays a strong selectivity against sodium. Seems to directly participate in pathogen-induced calcium influx. May function in homeostasis, re-establishing ionic balance after defense actio…	Cyclic nucleotide gated channel; Probable cyclic nucleotide-gated ion channel	0.911
ZmCNGC11	GRMZM2G176903	Hypothetical protein LOC100272382	Hypothetical protein LOC100191240	DND1	EXO70B1	AT5G15410.1	AT5G58430.1	DEFENSE NO DEATH 1; Acts as cyclic nucleotide-gated ion channel. Permeable to potassium and calcium in a cyclic nucleotide-dependent fashion (cAMP or cGMP). Could also transport lithium, cesium and rubium and displays a strong selectivity against sodium. Seems to directly participate in pathogen-induced calcium influx. May function in homeostasis, re-establishing ionic balance after defense actio…	Exocyst subunit exo70 family protein B1; Component of an exocyst subcomplex specifically involved in autophagy-related, Golgi-independent membrane traffic to the vacuole. Regulates autophagosome formation and autophagy-related Golgi-independent import into the vacuole	0.911
ZmCNGC12	GRMZM2G121742	Cyclic nucleotide-gated ion channel 2	Annotation not available	AtCNGC4	CNBT1	AT5G54250.1	AT3G17700.1	Cyclic nucleotide-gated ion channel 4; Acts as cyclic nucleotide-gated ion channel. Permeable to potassium and sodium in a cyclic nucleotide-dependent fashion (cAMP or cGMP). Might constitute a common downstream component of the signaling pathways leading to hypersensitive response (HR)	Cyclic nucleotide gated channel; Probable cyclic nucleotide-gated ion channel	0.912
ZmCNGC12	GRMZM2G129969	Cyclic nucleotide-gated ion channel 2	Annotation not available	AtCNGC4	CNGC1	AT5G54250.1	AT5G53130.1	Cyclic nucleotide-gated ion channel 4; Acts as cyclic nucleotide-gated ion channel. Permeable to potassium and sodium in a cyclic nucleotide-dependent fashion (cAMP or cGMP). Might constitute a common downstream component of the signaling pathways leading to hypersensitive response (HR)	Cyclic nucleotide gated channel 1; Acts as cyclic nucleotide-gated ion channel. Can be activated by cyclic AMP which leads to an opening of the cation channel. May be responsible for cAMP-induced calcium entry in cells and thus should be involved in the calcium signal transduction. Could transport K(+), Na(+) and Pb(2+)	0.913
ZmCNGC12	GRMZM2G155720	Cyclic nucleotide-gated ion channel 2	Annotation not available	AtCNGC4	CNGC10	AT5G54250.1	AT1G01340.2	Cyclic nucleotide-gated ion channel 4; Acts as cyclic nucleotide-gated ion channel. Permeable to potassium and sodium in a cyclic nucleotide-dependent fashion (cAMP or cGMP). Might constitute a common downstream component of the signaling pathways leading to hypersensitive response (HR)	Cyclic nucleotide gated channel; Probable cyclic nucleotide-gated ion channel	0.91
ZmCNGC12	GRMZM2G158437	Cyclic nucleotide-gated ion channel 2	Hypothetical protein LOC100384034	AtCNGC4	CNGC11	AT5G54250.1	AT2G46440.1	Cyclic nucleotide-gated ion channel 4; Acts as cyclic nucleotide-gated ion channel. Permeable to potassium and sodium in a cyclic nucleotide-dependent fashion (cAMP or cGMP). Might constitute a common downstream component of the signaling pathways leading to hypersensitive response (HR)	Cyclic nucleotide-gated channels; Putative cyclic nucleotide-gated ion channel	0.921
ZmCNGC12	GRMZM2G167308	Cyclic nucleotide-gated ion channel 2	Annotation not available	AtCNGC4	CNGC12	AT5G54250.1	AT2G46450.1	Cyclic nucleotide-gated ion channel 4; Acts as cyclic nucleotide-gated ion channel. Permeable to potassium and sodium in a cyclic nucleotide-dependent fashion (cAMP or cGMP). Might constitute a common downstream component of the signaling pathways leading to hypersensitive response (HR)	Cyclic nucleotide gated channel; Probable cyclic nucleotide-gated ion channel	0.921
ZmCNGC12	GRMZM2G448247	Cyclic nucleotide-gated ion channel 2	Hypothetical protein LOC100383880	AtCNGC4	CNGC18	AT5G54250.1	AT5G14870.1	Cyclic nucleotide-gated ion channel 4; Acts as cyclic nucleotide-gated ion channel. Permeable to potassium and sodium in a cyclic nucleotide-dependent fashion (cAMP or cGMP). Might constitute a common downstream component of the signaling pathways leading to hypersensitive response (HR)	Cyclic nucleotide-gated channel 18; Putative cyclic nucleotide-gated ion channel	0.909
ZmCNGC12	GRMZM5G813143	Cyclic nucleotide-gated ion channel 2	Hypothetical protein LOC100194055	AtCNGC4	CNGC19	AT5G54250.1	AT3G17690.1	Cyclic nucleotide-gated ion channel 4; Acts as cyclic nucleotide-gated ion channel. Permeable to potassium and sodium in a cyclic nucleotide-dependent fashion (cAMP or cGMP). Might constitute a common downstream component of the signaling pathways leading to hypersensitive response (HR)	Cyclic nucleotide gated channel 19; Putative cyclic nucleotide-gated ion channel	0.913
ZmCNGC12	GRMZM2G356938	Cyclic nucleotide-gated ion channel 2	Voltage-gated potassium channel beta subunit	AtCNGC4	CNGC3	AT5G54250.1	AT2G46430.1	Cyclic nucleotide-gated ion channel 4; Acts as cyclic nucleotide-gated ion channel. Permeable to potassium and sodium in a cyclic nucleotide-dependent fashion (cAMP or cGMP). Might constitute a common downstream component of the signaling pathways leading to hypersensitive response (HR)	Cyclic nucleotide gated channel; Probable cyclic nucleotide-gated ion channel	0.914
ZmCNGC12	GRMZM2G142661	Cyclic nucleotide-gated ion channel 2	LOC100280467	AtCNGC4	CNGC6	AT5G54250.1	AT2G23980.1	Cyclic nucleotide-gated ion channel 4; Acts as cyclic nucleotide-gated ion channel. Permeable to potassium and sodium in a cyclic nucleotide-dependent fashion (cAMP or cGMP). Might constitute a common downstream component of the signaling pathways leading to hypersensitive response (HR)	Cyclic nucleotide gated channel; Probable cyclic nucleotide-gated ion channel	0.909
ZmCNGC12	GRMZM2G176903	Cyclic nucleotide-gated ion channel 2	Hypothetical protein LOC100191240	AtCNGC4	DND1	AT5G54250.1	AT5G15410.1	Cyclic nucleotide-gated ion channel 4; Acts as cyclic nucleotide-gated ion channel. Permeable to potassium and sodium in a cyclic nucleotide-dependent fashion (cAMP or cGMP). Might constitute a common downstream component of the signaling pathways leading to hypersensitive response (HR)	DEFENSE NO DEATH 1; Acts as cyclic nucleotide-gated ion channel. Permeable to potassium and calcium in a cyclic nucleotide-dependent fashion (cAMP or cGMP). Could also transport lithium, cesium and rubium and displays a strong selectivity against sodium. Seems to directly participate in pathogen-induced calcium influx. May function in homeostasis, re-establishing ionic balance after defense actio…	0.911

## Sheet: Table S4
Table S4 The FPKM data of ZmCNGC genes in different tissues.
Gene ID	ZmCNGC1	ZmCNGC2	ZmCNGC3	ZmCNGC4	ZmCNGC5	ZmCNGC6	ZmCNGC7	ZmCNGC8	ZmCNGC9	ZmCNGC10	ZmCNGC11	ZmCNGC12
root	8	22	0.1	25	0	17	0.7	23	3	6	0.4	0
ear	5	9	0	14	0	12	0	11	9	5	0.9	0.7
tassel	6	9	0	14	0	11	0.1	13	9	3	1	0.5
embryo	5	3	0	10	0	7	0	10	8	25	18	17
endosperm	1	5	0	3	0	5	0	8	8	0.4	0.8	0.4
pollen	9	0.2	0	0.2	18	1	0	0.2	0.2	0.1	1	0.1
10 Day	3	3	0	9	0	7	0	9	9	8	7	2
12 Day	3	3	0	10	0	5	0	9	9	18	17	2
14 Day	3	4	0	9	0	6	0	14	10	25	25	3
16 Day	4	3	0	9	0	5	0	12	8	24	21	7
18 Day	5	4	0	11	0	6	0.2	15	9	27	19	8
20 Day	5	4	0	13	0	4	0	16	9	23	20	6
22 Day	4	4	0	11	0	5	0	13	8	16	17	9
24 Day	4	5	0	11	0	6	0.1	16	8	16	23	6
26 Day	3	3	0	10	0	5	0	12	5	12	18	8
28 Day	3	3	0	8	0	4	0	12	6	12	14	8
30 Day	4	4	0	11	0	6	0	16	7	11	13	2
32 Day	4	4	0	8	0	5	0	19	6	11	12	2
34 Day	3	5	0	8	0	4	0	16	4	9	7	2
36 Day	4	6	0	10	0	5	0	21	5	8	3	2
38 Day	4	6	0	9	0	4	0	16	4	7	2	2
6 Day	2	2	0	6	0	5	0.1	12	10	1	1	0.1
8 Day	2	2	0	5	0	5	0	13	12	0.6	2	0
10 Day	1	3	0	2	0	3	0.1	12	13	0.2	0.2	0.2
12 Day	0.6	3	0	1	0	3	0	9	12	0.1	0.2	0.1
14 Day	0.5	3	0	1	0	3	0.2	9	12	0.1	0.2	0.2
16 Day	0.8	5	0	2	0	3	0.1	9	13	0.1	0.4	0.2
18 Day	1	5	0	2	0	6	0.2	10	18	0.4	0.1	0.3
20 Day	0.8	4	0	2	0	4	0.5	11	13	0.2	0.3	0.3
22 Day	1	4	0	2	0	4	0.2	9	12	0.5	0.7	0.7
24 Day	1	7	0	2	0	4	0.1	11	13	0.3	0.4	0.2
26 Day	1	9	0	1	0	4	0.2	9	12	0.3	0.3	0.1
28 Day	1	8	0	2	0	4	0	8	9	0.6	0.7	0.4
30 Day	1	9	0	2	0	4	0	9	14	0.3	0.3	0.4
32 Day	3	14	0	5	0	6	0	14	10	2	0.3	0.2
34 Day	3	18	0	5	0	10	0.1	16	12	2	0.4	0.9
36 Day	3	11	0	7	0	7	0	17	5	2	0	0.3
38 Day	4	10	0	9	0	5	0	15	1	5	0.3	0.1
0 Day	7	13	0	21	0	9	0.1	27	12	7	4	1
2 Day	6	12	0	12	0	10	0.1	25	15	6	4	4
3 Day	6	10	0	13	0	10	0	25	13	7	6	9
4 Day	7	12	0	15	0	8	0	26	11	9	7	6
6 Day	7	12	0	11	0	8	0	35	10	5	6	4
8 Day	4	9	0	8	0	8	0.1	31	9	2	4	4
10 Day	2	5	0	5	0	4	0.2	20	12	1	2	1
12 Day	2	6	0	3	0	4	0.2	19	10	1	1	0.8
14 Day	1	4	0	3	0	4	0.3	15	11	1	1	1
16 Day	3	6	0	4	0	6	0.3	22	14	2	2	1
18 Day	2	6	0	4	0	5	0.5	18	14	3	3	2
20 Day	2	5	0	4	0	5	0.8	17	12	4	3	2
22 Day	3	11	0	4	0	4	0	19	12	3	2	2
24 Day	2	6	0	4	0	4	0.2	14	9	3	4	2
26 Day	3	9	0	5	0	7	0.1	18	12	3	3	1
28 Day	3	9	0	6	0	6	0	15	9	5	3	0.6
30 Day	4	10	0	9	0	7	0	16	5	6	2	3
32 Day	6	15	0	12	0	8	0	23	5	8	2	1
34 Day	5	9	0	11	0	7	0	17	4	6	3	3
36 Day	5	13	0	14	0	7	0.1	22	6	5	3	0.6
38 Day	4	11	0	11	0	7	0	20	3	5	1	2
